# Supplementary material for: Discovery, characterization, and comparative analysis of new UGT72 and UGT84 family glycosyltransferases
Source: PubMed Central journal article supplement (PMC11213884; doi:10.1038/s42004-024-01231-1), 2024-06-28
Supplement: 42004_2024_1231_MOESM2_ESM.pdf [file 42004_2024_1231_MOESM2_ESM.pdf]

1 **Supplementary Information**

2  
3 **Discovery, characterization, and comparative analysis of new UGT72 and UGT84 family**  
4 **glycosyltransferases**

5  
6 Tuo Li<sup>1\*</sup>, Annika J. E. Borg<sup>1\*</sup>, Leo Krammer<sup>2</sup>, Hansjörg Weber<sup>2</sup>, Rolf Breinbauer<sup>2</sup> & Bernd  
7 Nidetzky<sup>1,3\*\*</sup>

8  
9 <sup>1</sup>Institute of Biotechnology and Biochemical Engineering, Graz University of Technology,  
10 NAWI Graz, Petersgasse 12/1, 8010 Graz, Austria

11 <sup>2</sup>Institute of Organic Chemistry, Graz University of Technology, NAWI Graz, Stremayrgasse 9,  
12 8010 Graz, Austria

13 <sup>3</sup>Austrian Centre of Industrial Biotechnology (acib), Krenngasse 37, 8010 Graz, Austria

14  
15 \*These authors contributed equally.

16 \*\*Corresponding author: Bernd Nidetzky (bernd.nidetzky@tugraz.at)

17

## 18 **Supplementary Methods**

### 19 **Materials**

20 Sinapic acid (>98%), coniferyl aldehyde (>98%), *p*-HAP (>99%), picein (>98%), apigenin 7-  
21 *O*-glucoside (>97%), luteolin 7-*O*-glucoside (>98%), UDP-galactose (>95%), and UDP-  
22 glucuronic acid (>98%) were from Sigma Aldrich (Vienna, Austria). Phlorizin (>98%) was  
23 from Roth (Karlsruhe, Germany). Phloretin (>98%), apigenin (>97%), luteolin (>98%),  
24 daidzein (>98%), daidzin (>97%), UDP (>97%) and UDP-glucose (>98%) were from  
25 Carbosynth (Compton, UK). UDP-xylose (>99%) was obtained from a previous study using  
26 enzymatic synthesis<sup>1</sup>. All other reagents and chemicals were of highest available purity and  
27 purchased from Sigma Aldrich/Fluka (Vienna, Austria), Roth (Karlsruhe, Germany) or Merck  
28 (Vienna, Austria).

### 29 **Enzyme production**

30 The cells harboring pET-28a\_UGT (UGT72D1, UGT72D7, UGT84A49, UGT84A119) were  
31 cultivated individually in 10 mL of Terrific Broth (TB) medium with 50  $\mu\text{g mL}^{-1}$  kanamycin at  
32 37 °C for 16 h. From the pre-culture, 2 mL were used to inoculate fresh TB medium (250 mL)  
33 supplemented with 2% (v/v) glycerol and 50  $\mu\text{g mL}^{-1}$  kanamycin, and the cells were grown at  
34 37 °C and 120 rpm. Upon reaching a cell density ( $\text{OD}_{600}$ ) of 1.0, gene expression was induced  
35 by adding isopropyl  $\beta$ -D-thiogalactoside (IPTG; final concentration of 0.2 mM). The induced  
36 cells were incubated at 18 °C and 120 rpm for 20 h. The cells were harvested by centrifugation  
37 (3010 g, 4 °C, 30 min), followed by re-suspending the pellet in 10 mL of His-tag loading buffer  
38 (20 mM  $\text{Na}_2\text{HPO}_4$ , 500 mM NaCl, 20 mM imidazole, pH 7.4). The cell suspension was stored  
39 overnight at -20 °C prior to cell lysis. Sonication (Sonic Dismembrator Model 505, Fisher  
40 Scientific, Vienna, Austria) was employed for cell disruption (pulse 4 sec on, 6 sec off, 60%  
41 amplitude, 6 min), and the lysate was centrifuged at 4 °C, 21130 g for 60 min. The resulting  
42 supernatant, filtered through a 0.45  $\mu\text{m}$  filter, was loaded onto the HisTrap<sup>TM</sup> HP column (5 mL  
43 resin, Cytiva, Uppsala, Sweden) pre-equilibrated with the loading buffer. The column was  
44 washed with 50 mL loading buffer at the flowrate of 2  $\text{mL min}^{-1}$ . The elution of target protein  
45 was achieved by applying a gradient of 0-100% elution buffer (20 mM  $\text{Na}_2\text{HPO}_4$ , 500 mM

46 NaCl, 250 mM imidazole, pH 7.4) over 60 min. The pure fractions containing the target protein  
47 were pooled and subjected to buffer exchange against 50 mM Tris-HCl buffer (pH 7.4)  
48 supplemented with 1.0 mM DTT and 10% (v/v) glycerol using Vivaspin 20 ultrafiltration tubes  
49 (30,000 MWCO PES; Sartorius, Goettingen, Germany). After buffer exchange, the protein was  
50 divided into aliquots, flash frozen in liquid nitrogen, and stored at -20 °C. Protein concentration  
51 was determined based on the absorption at 280 nm on a spectrophotometer (Nanophotometer  
52 N50, IMPLLEN, Munich, Germany) using the molar extinction coefficient (Supplementary  
53 Table 1) calculated from the amino acid sequence.

#### 54 **Enzyme activity assays**

##### 55 Activity assays toward sinapic acid and coniferyl aldehyde

56 The reaction mixture (100 µL) contained 1.0 mM sinapic acid or coniferyl aldehyde (dissolved  
57 in DMSO at a final concentration of 2%), 2.0 mM UDP-Glc and 0.0050-0.50 mg mL<sup>-1</sup> UGT in  
58 50 mM potassium phosphate buffer. For activity assays toward sinapic acid,  
59 UGT84A119/UGT84A49 (0.005 mg mL<sup>-1</sup>) were employed at pH 5.0, while 0.05 mg mL<sup>-1</sup>  
60 UGT72D7 or 0.5 mg mL<sup>-1</sup> UGT72D1 were used at pH 8.0. For activity assays toward coniferyl  
61 aldehyde, UGT72D1/UGT72D7 (0.005 mg mL<sup>-1</sup>) or UGT84A49/UGT84A119 (0.5 mg mL<sup>-1</sup>)  
62 were utilized at pH 8.0. The reactions were incubated at 30 °C without agitation, quenched with  
63 methanol (75% (v/v) final concentration) at desired time points, and the precipitated enzymes  
64 removed by centrifugation (21130 g, 4 °C, 30 min) prior to HPLC analysis. The initial formation  
65 rates for products (glucosides or glucose ester) were determined from the corresponding linear  
66 parts of the time courses, by dividing the slope of the linear regression (mM min<sup>-1</sup>) by the  
67 enzyme concentration (mg mL<sup>-1</sup>), providing the initial rate in µmol (min mg protein)<sup>-1</sup>. One  
68 unit (U) of UGT activity is defined as the amount of enzyme producing 1 µmol of product (*O*-  
69 glucoside or glucose ester) per minute under conditions used, where the acceptor substrate is  
70 present in excess. All the activity assays were performed in duplicates (N=2).

##### 71 Activity assays toward selected phenolic substrates

72 The reaction mixture (100 µL) contained 1.0 mM acceptor substrate (*p*-HAP, phloretin,  
73 apigenin, luteolin or daidzein; dissolved in DMSO at a final concentration of 2%), 2.0 mM

74 UDP-sugar (UDP-glucose, UDP-xylose, UDP-galactose, or UDP-glucuronic acid), and 0.5 mg  
75 mL<sup>-1</sup> UGT (UGT84A119, UGT84A49, UGT72D1, UGT72D7) in potassium phosphate buffer  
76 (50 mM, pH 8.0). The reactions were conducted and analyzed as described under “Activity  
77 assays toward sinapic acid and coniferyl aldehyde”.

## 78 **Preparation and isolation of products**

### 79 Sinapic acid 4-*O*-glucoside

80 The reaction (50 mL) was carried out in a 250 mL flask under the following conditions: 2.0  
81 mM sinapic acid (dissolved in DMSO at a final concentration of 2%), 4.0 mM UDP-Glc, 0.10  
82 mg mL<sup>-1</sup> UGT72D1, in potassium phosphate buffer (50 mM, pH 8.0). The reaction was  
83 performed at 30 °C, and stirred at 500 rpm. After 24 h, 10 µL of reaction mixture were sampled  
84 as described under “Activity assay toward sinapic acid and coniferyl aldehyde”, and subjected  
85 to HPLC analysis (conversion rate of sinapic acid 4-*O*-glucoside, 53%). The reaction was  
86 quenched by removing the enzymes using Vivaspin 20 ultrafiltration tubes (10,000 MWCO  
87 PES; Sartorius, Goettingen, Germany), at 3220 g and 4 °C. Subsequently, solvent in the reaction  
88 mixture was removed under reduced pressure on a Laborota 4000 rotary evaporator (Heidolph,  
89 Schwabach, Germany) at 40 °C. The crude product was resuspended in 2.0 mL solvent mixture  
90 of 1-butanol and methanol (4: 1), and loaded into a silica 60 column (30 mL, 0.04-0.063 mm,  
91 Machery-nagel, Duren, Germany) for purification of sinapic acid 4-*O*-glucoside. The column  
92 was washed with the solvent mixture, and the eluted fractions analyzed on HPLC. The product-  
93 containing fractions were pooled and the solvent removed by rotary evaporator (as described  
94 above) and lyophilization (Christ Alpha 1-4 lyophilizer, B. Braun Biotech International,  
95 Melsungen, Germany).

### 96 Sinapic acid glucose ester

97 The reaction was performed as described under “Sinapic acid 4-*O*-glucoside”, except that 0.10  
98 mg mL<sup>-1</sup> UGT84A119 was used in potassium phosphate buffer (50 mM, pH 5.0). After 24 h,  
99 the reaction was sampled and analyzed on HPLC (conversion rate of sinapic acid glucose ester,  
100 35%). The target product was isolated as described under “Sinapic acid 4-*O*-glucoside”.

101

102 Coniferyl aldehyde 4-*O*-glucoside

103 The reaction was performed as described under “Sinapic acid 4-*O*-glucoside”, except that 2.0  
104 mM coniferyl aldehyde (dissolved in DMSO at a final concentration of 2%) was used. After 24  
105 h, the reaction was sampled and analyzed on HPLC (conversion rate of coniferyl aldehyde 4-  
106 *O*-glucoside, 95%). Afterwards, the enzymes and the solvent were removed as described under  
107 “Sinapic acid 4-*O*-glucoside”, the crude product redissolved in 2 mL methanol and loaded onto  
108 silica plates (20 cm × 20 cm, layer thickness 2 mm; Merck, Darmstadt, Germany). The thin-  
109 layer chromatography (TLC) was performed with eluent 1-butanol/acetic acid/deionized water  
110 (2:1:1) and the area corresponding to coniferyl aldehyde 4-*O*-glucoside located under a UV  
111 lamp (Supplementary Figure 37). The target product was scratched off the plate with a spatula,  
112 and extracted from the silica powder with 15 mL methanol in 50 mL Sarstedt tube by manual  
113 inversion every 15 min for 1 h. Subsequently, the solvent was removed by rotary evaporator  
114 and lyophilization (as described above).

115 Phloretin 4'-*O*-glucoside

116 The reactions (15 × 1.0 mL) were carried out in 2 mL Eppendorf tubes under the following  
117 reaction conditions: 2.0 mM phloretin (dissolved in DMSO at a final concentration of 4%), 4.0  
118 mM UDP-Glc, 5.0 mg mL<sup>-1</sup> UGT84A119, in potassium phosphate buffer (50 mM, pH 8.0). The  
119 reactions were conducted at 30 °C without agitation. After 24 h, additional UGT84A119 (3.0  
120 mg mL<sup>-1</sup>) was added into the reaction mixture. After 30 h, the reaction was sampled and  
121 analyzed on HPLC (conversion rate of phloretin 2'-*O*-glucoside and 4'-*O*-glucoside, 7% and  
122 63%, respectively). The reactions were quenched by removing the enzymes as described under  
123 “Sinapic acid 4-*O*-glucoside”. The filtered mixture was lyophilized, re-dissolved in deionized  
124 water and loaded into a column containing silica gel C18 (20 mL, 0.025-0.07 mm, ROTH,  
125 Karlsruhe, Germany). Deionized water (30 mL) and a mixture of acetonitrile/deionized water  
126 (1:9; 50 mL) was used to wash out impurities and phloretin 4'-*O*-glucoside was eluted with 50  
127 mL of acetonitrile/deionized water (1:4) mixture. The fractions (5 mL) were analyzed on TLC  
128 and by HPLC-MS. The pure fractions containing the target product were lyophilized to give  
129 the pure product.

130 Apigenin 4'-O-glucoside & apigenin 7,4'-di-O-glucoside

131 The reactions (20 × 1.0 mL) were carried out in 2 mL Eppendorf tubes under the following  
132 reaction conditions: 2.0 mM apigenin (dissolved in DMSO at a final concentration of 10%), 6.0  
133 mM UDP-Glc, 0.50 mg mL<sup>-1</sup> UGT84A49, in potassium phosphate buffer (50 mM, pH 8.0).  
134 Reactions were conducted at 30 °C without agitation. After 24 h, the reaction was sampled and  
135 analyzed by HPLC (conversion rate of apigenin 7-O, 4'-O, and 7,4'-di-O-glucoside, 16%, 15%  
136 and 35%, respectively). The reactions were quenched, and lyophilized as described under  
137 “Phloretin 4'-O-glucoside”. The product mixture was re-dissolved in a 1:1 mixture of deionized  
138 water and DMSO, and subjected to preparative HPLC for product isolation using the method  
139 “*Method Prep\_1*” as described under “Reversed-Phase Preparative HPLC”.

140 Luteolin 3'-O-glucoside

141 The reactions were performed as described under “Phloretin 4'-O-glucoside”, except that 2.0  
142 mM luteolin (dissolved in DMSO at a final concentration of 10%), and 0.50 mg mL<sup>-1</sup> UGT72D1  
143 was used. The reactions were quenched at 24 h (conversion rate of luteolin 7-O and 3'-O-  
144 glucoside, 35% and 63%, respectively). The enzyme was removed and the supernatant  
145 lyophilized as described under “Phloretin 4'-O-glucoside”. The product mixture was re-  
146 dissolved in DMSO, and subjected to preparative HPLC for product isolation using the method  
147 “*Method Prep\_2*” as described under “Reversed-Phase Preparative HPLC”.

148 Luteolin 4'-O-glucoside & luteolin 7,4'-di-O-glucoside

149 The reactions were performed as described under “Apigenin 4'-O-glucoside”, except that 2.0  
150 mM luteolin (dissolved in DMSO at a final concentration of 10%) was used. After 24 h, the  
151 reaction was sampled and analyzed by HPLC (conversion rate of luteolin 7-O, 4'-O, and 7,4'-  
152 di-O-glucoside, 23% 22%, and 45%, respectively). The enzyme removal and supernatant  
153 lyophilization were performed as described under “Phloretin 4'-O-glucoside”. The product  
154 mixture was re-dissolved in a mixture of deionized water and DMSO (1:1), and the individual  
155 products isolated as described under “Luteolin 3'-O-glucoside”.

156

157

158 **Analytical methods**

159 HPLC-UV/MS

160 Analytical HPLC-UVMS measurements were performed on an Agilent Technologies 1200  
161 Series system (G1379 Degasser, G1312 Binary Pump, G1367C HiP ALS SL Autosampler,  
162 G1330B FC/ALS Thermostat, G1316B TCC SL column compartment, G1365C MWD SL  
163 multiple wavelength detector (deuterium lamp, 190-400 nm)) equipped with a single  
164 quadrupole LCMS detector “6120 LC/MS” using electrospray ionization source (ESI in  
165 positive and negative mode). Separations were carried out on a C-18-Reversed-Phase column  
166 of the type “Poroshell® 120 SB-C18, 3.0 × 100 mm, 2.7 μm” by Agilent Technologies. Flow:  
167 Constant flow rate 0.7 mL min<sup>-1</sup>, T = 35 °C. The following method was used: *MeCN\_2\_100*:  
168 0.0-0.1 min, isocratic, 2% MeCN (98% H<sub>2</sub>O + 0.05% TFA); 0.1- 8.0 min, linear, 2% to 100%  
169 MeCN (98% to 0% H<sub>2</sub>O + 0.05% TFA); 8.0-11.1 min, isocratic, 100% MeCN; 11.1-11.3 min,  
170 linear, 100% to 2% MeCN (0% to 9% H<sub>2</sub>O + 0.05 % TFA); 11.3-12.0 min, isocratic, 2% MeCN  
171 (98% H<sub>2</sub>O + 0.05% TFA).

172 Reversed-Phase Preparative HPLC

173 Reversed phase preparative HPLC purifications were performed on a Thermo Scientific  
174 UltiMate 3000 system. Detection was accomplished with a Dionex UltiMate Diode Array  
175 Detector. The separations were carried out on a Macherey Nagel 125/21 Nucleodur® 100-5  
176 C18EC (125 × 21 mm, 5 μm) column. Acetonitrile and water with 0.05%-0.1% trifluoroacetic  
177 acid were used as eluents for the purification of the compounds. Typically, the product fractions  
178 obtained from preparative HPLC were concentrated under reduced pressure to remove the  
179 organic solvents and then lyophilized to obtain the product.

180 The following methods were applied:

181 *Method Prep\_1*: T = 30 °C, constant flow rate: 15 mL min<sup>-1</sup>; 0.0-3.0 min, isocratic, 2% MeCN  
182 (98% H<sub>2</sub>O + 0.1% TFA), 3.0-16.0 min, linear, 2% to 50% MeCN (98% to 50% H<sub>2</sub>O + 0.1%  
183 TFA), 16.0-17.0 min, linear, 50% to 100% MeCN (50% to 0% H<sub>2</sub>O + 0.1% TFA), 17.0-18.0  
184 min, isocratic, 100% MeCN, 18.0-19.0 min, linear, 100% to 2% MeCN (0% to 2% H<sub>2</sub>O + 0.1%

185 TFA), 19.0-22.0 min, isocratic, 2% MeCN (98% H<sub>2</sub>O + 0.1% TFA).

186 *Method Prep\_2*: T = 30 °C, constant flow rate: 15 mL min<sup>-1</sup>; 0.0-3.0 min, isocratic, 2% MeCN

187 (98% H<sub>2</sub>O + 0.05% TFA), 3.0-13.0 min, linear, 2% to 50% MeCN (98% to 50% H<sub>2</sub>O + 0.05%

188 TFA), 13.0-14.0 min, linear, 50% to 100% MeCN (50% to 0% H<sub>2</sub>O + 0.05% TFA), 14.0-15.0

189 min, isocratic, 100% MeCN, 15.0-16.0 min, linear, 100% to 2% MeCN (0% to 2% H<sub>2</sub>O + 0.05%

190 TFA), 16.0-19.0 min, isocratic, 2% MeCN (98% H<sub>2</sub>O + 0.05% TFA).

191



**Supplementary Table 1.** Basic information of chosen UGT72 and UGT84 candidates.

| Entry | Abbreviation | Organism                    | Extinction coefficient<br>(M <sup>-1</sup> cm <sup>-1</sup> ) |
|-------|--------------|-----------------------------|---------------------------------------------------------------|
| 1     | UGT84A49     | <i>Fragaria ananassa</i>    | 61015                                                         |
| 2     | J045         | <i>Brassica napus</i>       | 53565                                                         |
| 3     | UGT84A119    | <i>Fagus sylvatica</i>      | 68005                                                         |
| 4     | UGT72D1      | <i>Arabidopsis thaliana</i> | 70275                                                         |
| 5     | UGT72D7      | <i>Citrus sinensis</i>      | 59025                                                         |
| 6     | KZ95         | <i>Artemisia annua</i>      | 52745                                                         |

194 **Supplementary Table 2.** Amino acid sequence identities between the putative UGT proteins  
195 and templates.

|         | UGT84A49 | UGT84A119 | J045 | UGT72D1 | UGT72D7 | KZ95 |
|---------|----------|-----------|------|---------|---------|------|
| UGT72E3 | 26       | 26        | 22   | 41      | 48      | 44   |
| UGT84A2 | 53       | 56        | 57   | 24      | 24      | 25   |

196

197 **Supplementary Table 3.** GenBank accession numbers of sequences used in the phylogenetic  
 198 analysis.

| UGT                | Access number  | UGT                | Access number  | UGT                | Access number  |
|--------------------|----------------|--------------------|----------------|--------------------|----------------|
| UGT71A15           | DQ103712       | UGT71A16           | FJ854494       | UGT71K1            | FJ854493       |
| UGT71K2            | FJ854495       | UGT71S4            | QDM38908.1     | UGT72AF1           | AOG18239.1     |
| UGT72AM1           | ASA40331.1     | <i>Ht</i> UGT72AS1 | UXB92752.1     | <i>Nb</i> UGT72AY1 | UHH90560.1     |
| <i>St</i> UGT72AY2 | XP_015164078.1 | UGT72AZ2           | QLI54351.1     | UGT72B1            | OAP00532.1     |
| UGT72B3            | NP_001322773.1 | UGT72B11           | ACB56923.1     | UGT72B14           | ANS59121.1     |
| UGT72B37           | QLI54353.1     | UGT72B39           | QLI54355.1     | UGT72B42           | QDM38905.1     |
| UGT72BD1           | QHB92369.1     | UGT72C1            | NP_195395.4    | UGT72D1            | Q9ZU72.1       |
| UGT72E1            | NP_566938.1    | UGT72E2            | NP_201470.1    | UGT72E3            | NP_198003.1    |
| UGT72E8            | UTO68652.1     | UGT72V3            | AOG18244.1     | UGT72X4            | XP_003532193.1 |
| UGT72X5            | QDM38910.1     | UGT72Z2            | AKK25344.1     | UGT72Z3            | XP_003532192.3 |
| <i>Pa</i> GT2      | BAG71125.1     | UGT73A10           | BAG80536.1     | UGT73B1            | NP_567955.1    |
| UGT73B28           | QDM38901.1     | UGT73C1            | NP_181213.1    | UGT73C6            | NP_181217.1    |
| UGT73P12           | BBN60799.1     | UGT74B1            | NP_173820.1    | UGT74D1            | OAP11252.1     |
| UGT74F1            | NP_181912.1    | UGT74F2            | NP_181910.1    | UGT74G1            | AAR06920.1     |
| UGT74M1            | ABK76266.1     | UGT75B1            | OAP16927.1     | UGT75L17           | AY786997       |
| UGT75L25           | QCC89365.1     | UGT75X1            | QCC89364.1     | UGT76C1            | NP_196206.1    |
| UGT76C2            | NP_196205.1    | UGT76E1            | NP_200766.2    | UGT76G1            | AAR06912.1     |
| UGT78D1            | NP_564357.1    | UGT78D3            | NP_197205.1    | UGT78K6            | BAF49297.1     |
| UGT79A6            | NP_001275524.1 | UGT84A1            | NP_193283.2    | UGT84A2            | NP_188793.1    |
| UGT84A3            | NP_193284.1    | UGT84A9a           | CAS03346.1     | UGT84A9c           | CAS03348.1     |
| UGT84A13           | AHA54051.1     | <i>Pg</i> UGT84A23 | ANN02875.1     | UGT84A25a          | BBB21213.1     |
| UGT84A26a          | BBB21215.1     | UGT84A33           | AYW01718.1     | UGT84A34           | BBA68563.1     |
| UGT84A57           | BBI55602.1     | UGT84A68           | WFR85803.1     | UGT84A77           | QZM06937.1     |
| UGT84B1            | NP_179907.1    | UGT84F6            | QDM38904.1     | UGT84F9            | XP_013470035.1 |
| <i>Fa</i> GT2      | AAU09443.1     | SGT1               | AAF98390.1     | <i>Vvg</i> GT1     | AEW31187.1     |
| <i>Vvg</i> GT2     | AEW31188.1     | <i>Vvg</i> GT3     | NP_001267849.1 | VLRSGt             | ABH03018.1     |
| UGT85A19           | ABV68925.1     | UGT85C2            | AAR06916.1     | UGT85K11           | BAO51834.1     |
| UGT88A29           | QDM38900.1     | UGT88A32           | MN381003       | UGT88A33           | MN381009       |
| UGT88F1            | EU246349       | UGT88F2            | FJ854496       | UGT88F4            | KX639792       |
| UGT88F6            | KC895981       | UGT88F7            | KC895982       | UGT88F8            | KC895983       |
| <i>Pg</i> UGT94B1  | AGR44632.1     | UGT94P1            | BAO51835.1     | UGT708A6           | NP_001132650.2 |
| UGT708A11          | QLF98873.1     | UGT708B4           | QGL05036.1     | UGT708C1           | BAP90360.1     |
| UGT708G1           | BBA18062.1     | UGT708G2           | BBA18063.1     | <i>Mp</i> UGT737B1 | PTQ47498.1     |
| <i>Vv</i> GT1      | NP_001384786.1 | UGT71E5            | AOC55048.1     | <i>Os</i> CGT      | CAQ77160.1     |

200  
201

**Supplementary Table 4.** HPLC columns and methods used in the analysis of the UGT reactions. MeCN = acetonitrile.

|                                                                     | HPLC columns                                                    | Methods                                                                                                                                                                             |
|---------------------------------------------------------------------|-----------------------------------------------------------------|-------------------------------------------------------------------------------------------------------------------------------------------------------------------------------------|
| UDP-sugar/UDP in all reactions (except for <i>p</i> -HAP reactions) | Kinetex C18 (5 $\mu$ m, 100 $\text{\AA}$ , 50 $\times$ 4.6 mm)  | Flow rate, 2.0 mL min <sup>-1</sup> ; 0-2 min, isocratic, 5% MeCN.                                                                                                                  |
| UDP-sugar/UDP in <i>p</i> -HAP reactions                            | Kinetex C18 (5 $\mu$ m, 100 $\text{\AA}$ , 150 $\times$ 4.6 mm) | Flow rate, 0.8 mL min <sup>-1</sup> ; 0-6 min, isocratic, 20% MeCN.                                                                                                                 |
| Acceptor/product in all reactions (except for apigenin reactions)   | Kinetex C18 (5 $\mu$ m, 100 $\text{\AA}$ , 150 $\times$ 4.6 mm) | Flow rate, 1.0 mL min <sup>-1</sup> ; 0-5.5 min, linear, 20% to 75% MeCN; 5.5-7.5 min, isocratic, 75% MeCN; 7.5-7.51 min, linear, 75% to 20% MeCN; 7.51-9 min, isocratic, 20% MeCN. |
| Acceptor/product in apigenin reactions                              | Kinetex C18 (3 $\mu$ m, 100 $\text{\AA}$ , 200 $\times$ 4.6 mm) | Flow rate, 0.6 mL min <sup>-1</sup> ; 0-15 min, linear, 20% to 75% MeCN; 15-16 min, isocratic, 75% MeCN; 16-16.01 min, linear, 75% to 20% MeCN; 16.01-18 min, isocratic, 20% MeCN.  |

202

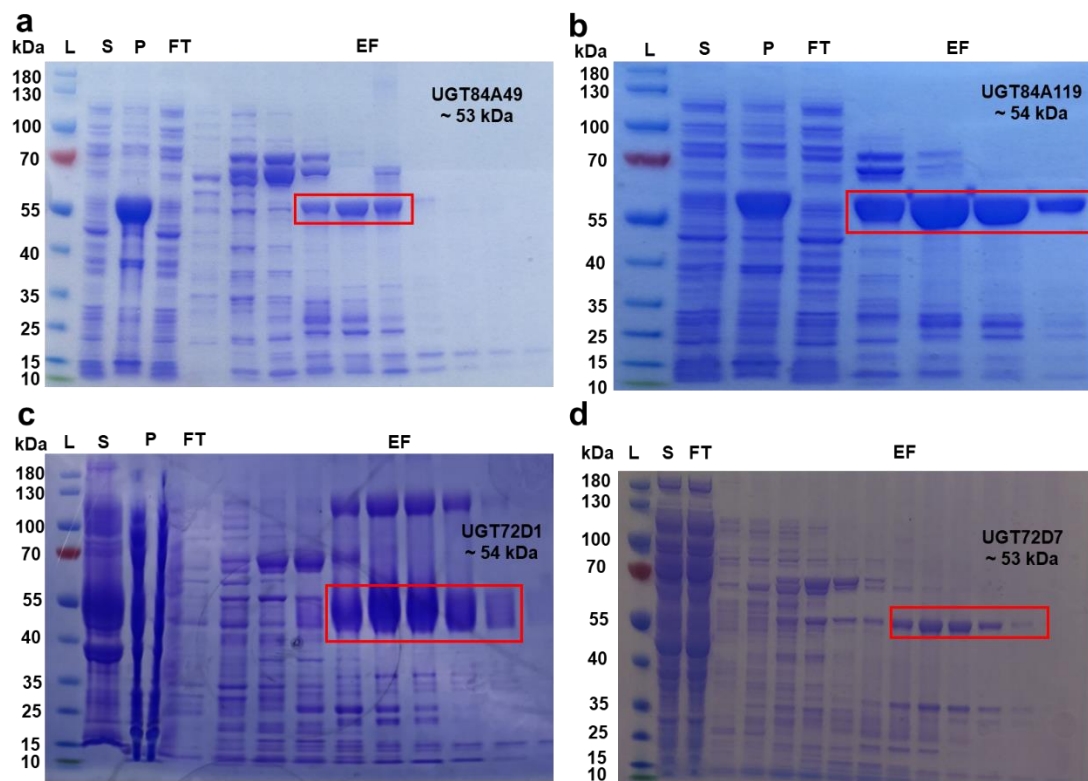

203

204 **Supplementary Figure 1.** SDS-gels from the His-tag purification of UGT84A49 (a),  
 205 UGT84A119 (b), UGT72D1 (c) and UGT72D7 (d). L, molecular mass marker; S, supernatant;  
 206 P, pellet; FT, flow through (unbound proteins); EF, elution fractions.

207

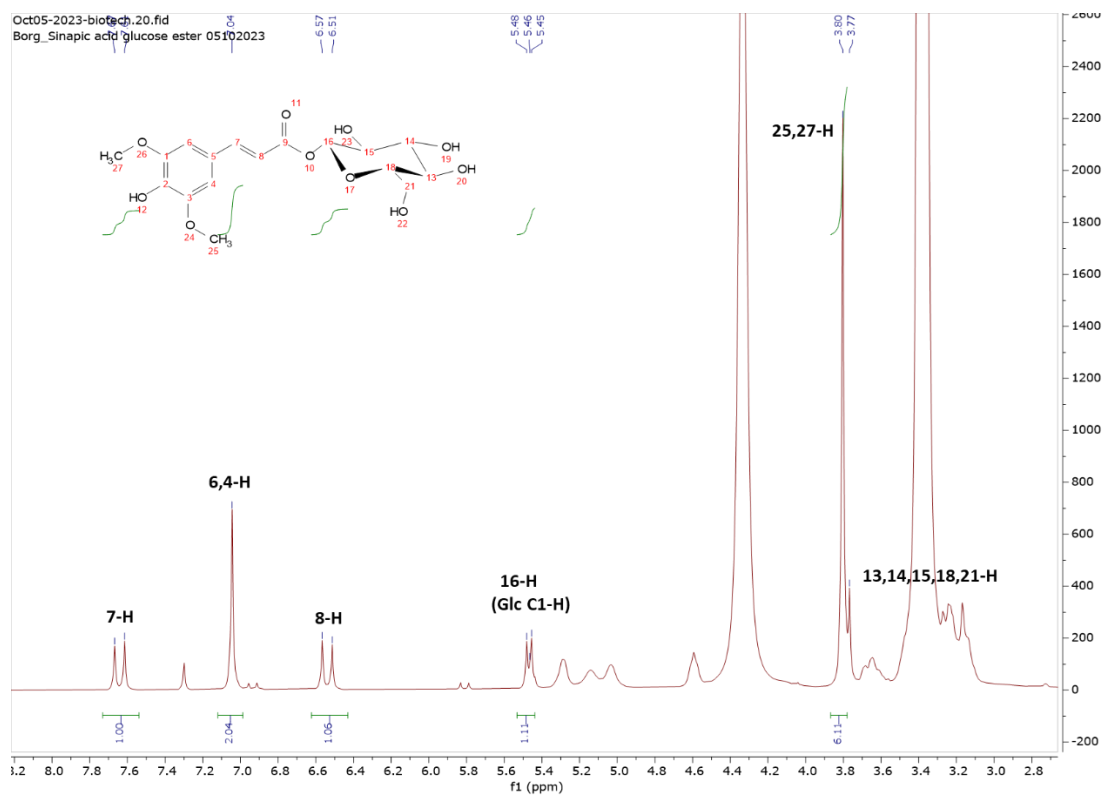

208

209 **Supplementary Figure 2.** <sup>1</sup>H NMR spectrum (300 MHz, D<sub>2</sub>O) of isolated sinapic acid glucose

210 ester: δ 7.65 ppm (d, 1H), 7.04 ppm (s, 2H), 6.54 ppm (d, 1H), 5.46 ppm (d, 1H), 3.78 ppm (s,

211 6H). The signals from glucose C2-OH, C3-OH, C4-OH, C5-OH and C6-OH are under the

212 signal of methanol at 3.34 ppm.

213

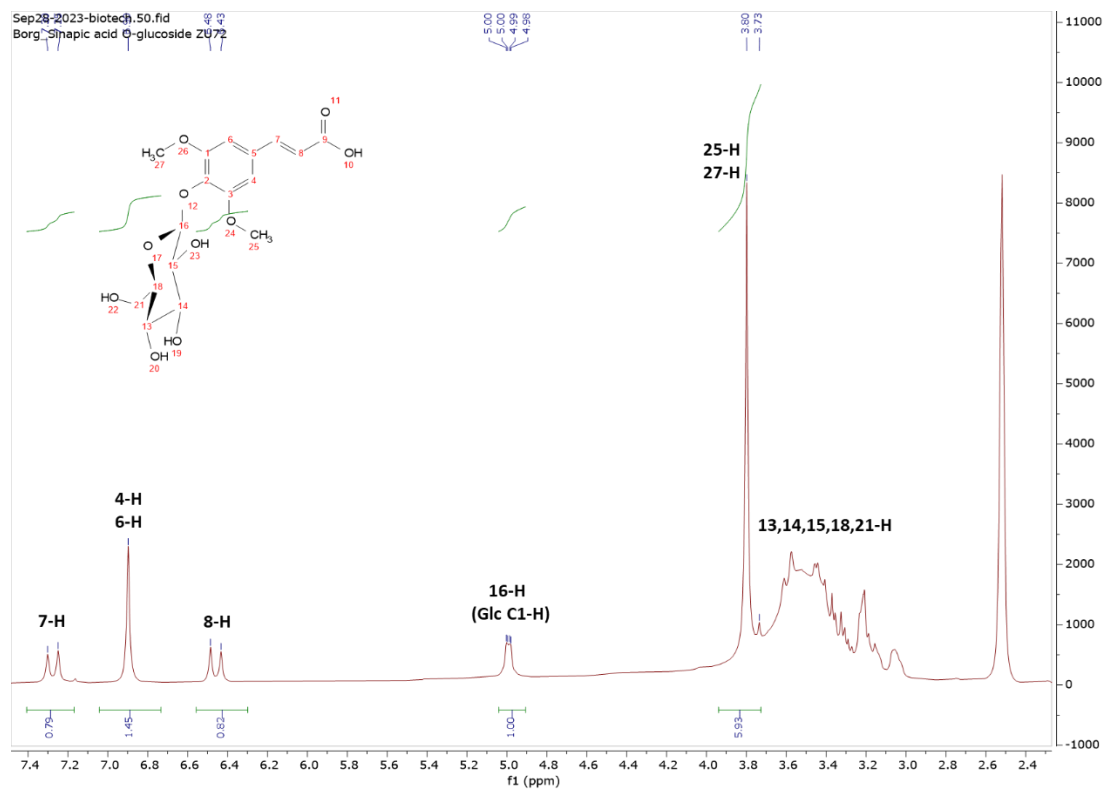

214

215 **Supplementary Figure 3.**  $^1\text{H}$  NMR spectrum (300 MHz,  $\text{D}_2\text{O}$ ) of isolated sinapic acid 4-*O*-  
 216 glucoside:  $\delta$  7.30 ppm (d, 1H), 6.90 ppm (s, 2H), 6.45 ppm (d, 1H), 4.99 ppm (d, 1H), 3.76 ppm  
 217 (s, 6H). The signals from glucose C2-OH, C3-OH, C4-OH, C5-OH and C6-OH appear together  
 218 at 3.2-3.6 ppm.

219

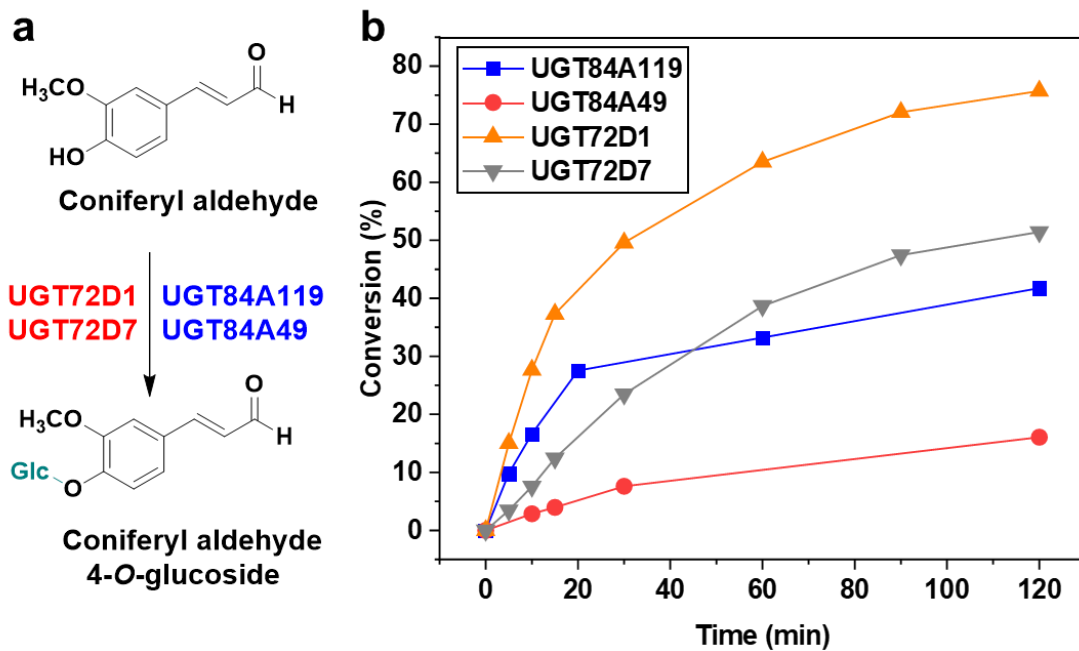

220

221 **Supplementary Figure 4.** Reaction scheme and time courses for UGT reactions toward  
 222 coniferyl aldehyde. **a.** Reaction scheme from coniferyl aldehyde to corresponding 4-*O*-  
 223 glucoside catalyzed by UGT72D1, UGT72D7, UGT84A119, or UGT84A49. **b.** Time course of  
 224 product formation in UGT reactions for measuring the enzymatic activities. Reactions (100  $\mu$ L)  
 225 contained 1.0 mM coniferyl aldehyde, 2.0 mM UDP-Glc and 0.0050-0.50 mg mL<sup>-1</sup> enzymes in  
 226 50 mM potassium phosphate buffer (pH 8.0).

227



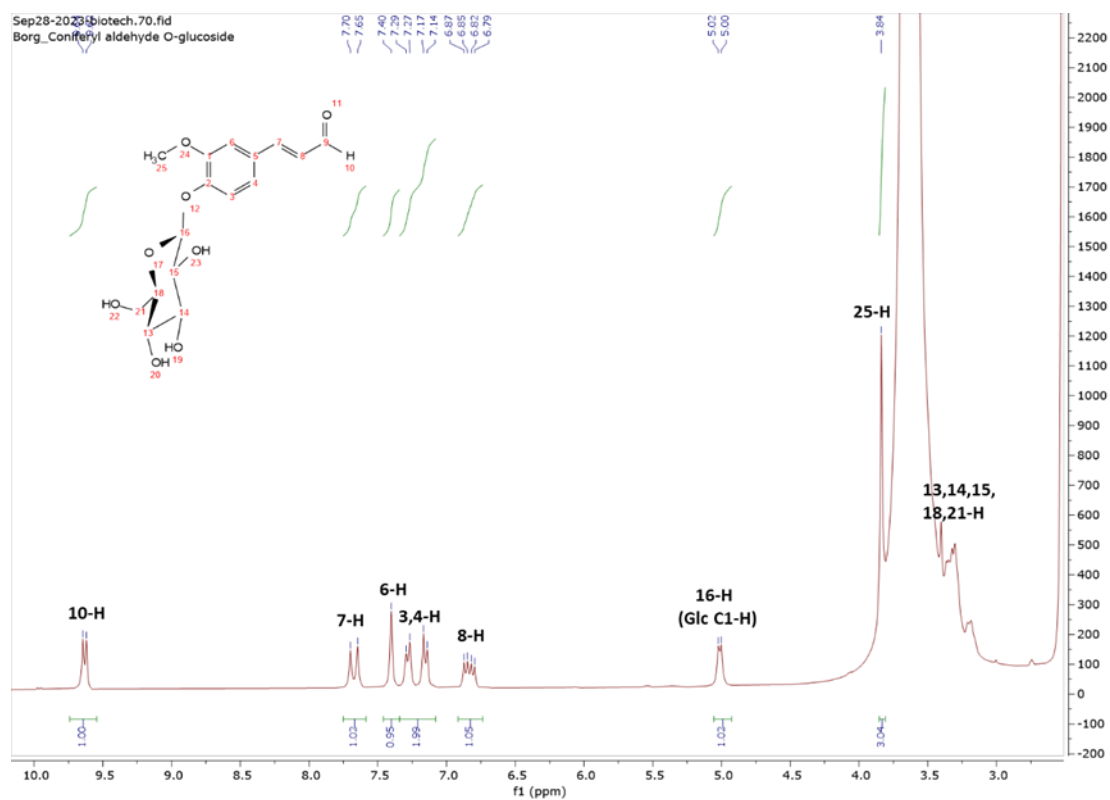

228

229 **Supplementary Figure 5.** <sup>1</sup>H NMR spectrum (300 MHz, D<sub>2</sub>O) of isolated coniferyl aldehyde  
 230 4-O-glucoside: δ 9.65 ppm (d, 1H), 7.67 ppm (d, 1H), 7.40 ppm (s, 1H), 7.27 ppm (dd, 2H),  
 231 6.85 ppm (dd, 1H), 5.01 ppm (d, 1H), 3.84 ppm (s, 3H). The signals from glucose C2-OH, C3-  
 232 OH, C4-OH, C5-OH and C6-OH appear together at 3.2-3.6 ppm.

233

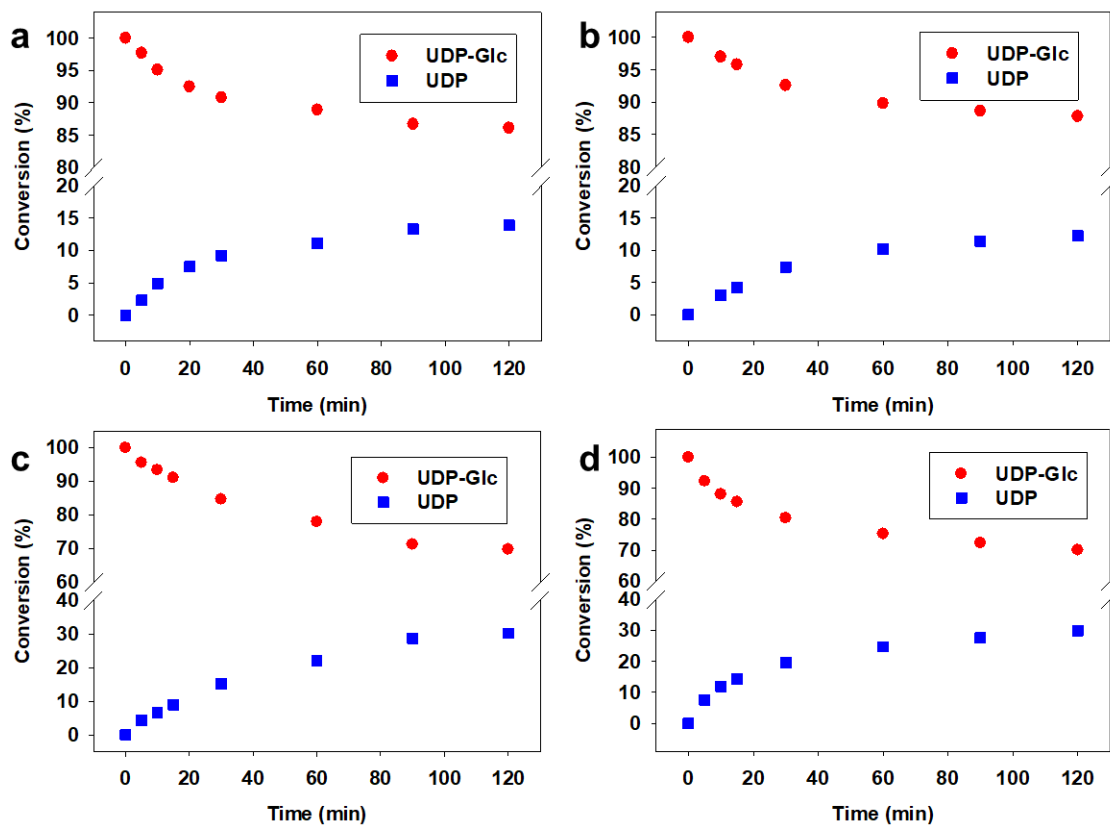

234

235 **Supplementary Figure 6.** Time course of UDP/UDP-Glc in UGT84A119 (a), UGT84A49 (b),  
 236 UGT72D7 (c) and UGT72D1 (d) reactions toward sinapic acid. Reactions (100  $\mu$ L) contained  
 237 1.0 mM sinapic acid, 2.0 mM UDP-Glc and 0.0050-0.50 mg mL<sup>-1</sup> enzymes in 50 mM potassium  
 238 phosphate buffer (pH 5.0 or 8.0).

239

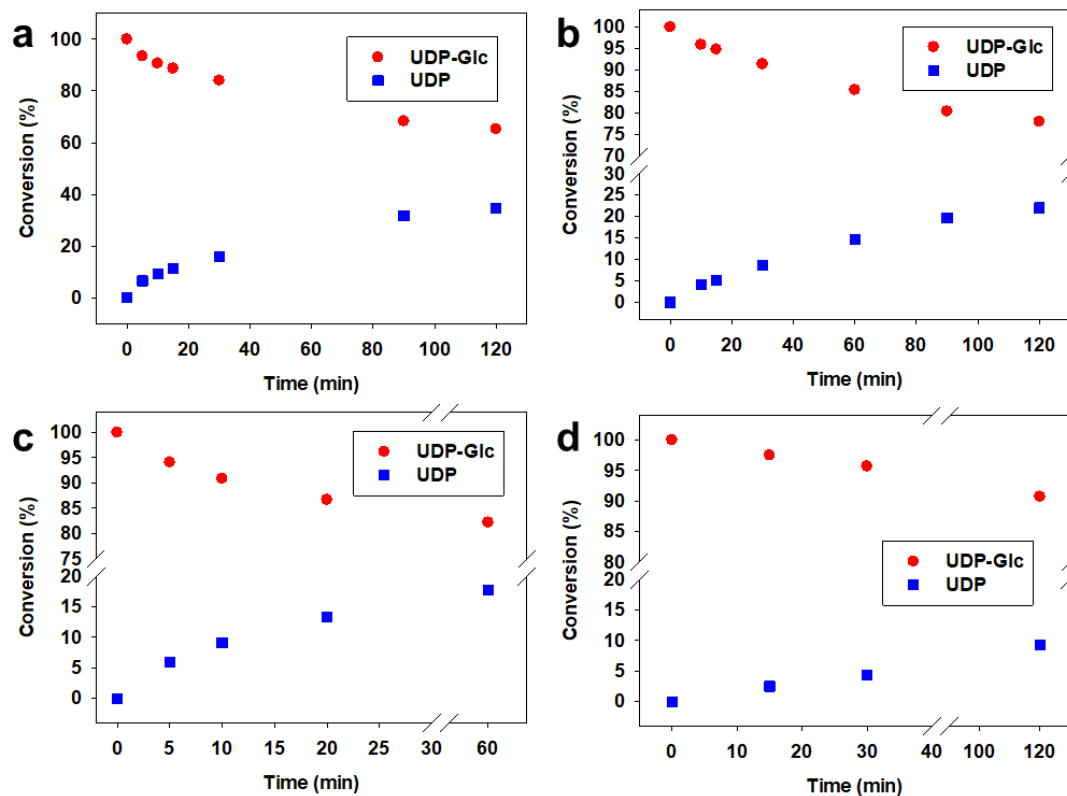

240

241 **Supplementary Figure 7.** Time course of UDP/UDP-Glc in UGT72D1 (a), UGT72D7 (b),  
 242 UGT84A119 (c) and UGT84A49 (d) reactions toward coniferyl aldehyde. Reactions (100  $\mu$ L)  
 243 contained 1.0 mM coniferyl aldehyde, 2.0 mM UDP-Glc and 0.0050-0.50 mg mL<sup>-1</sup> enzymes in  
 244 potassium phosphate buffer (50 mM, pH 8.0).

245

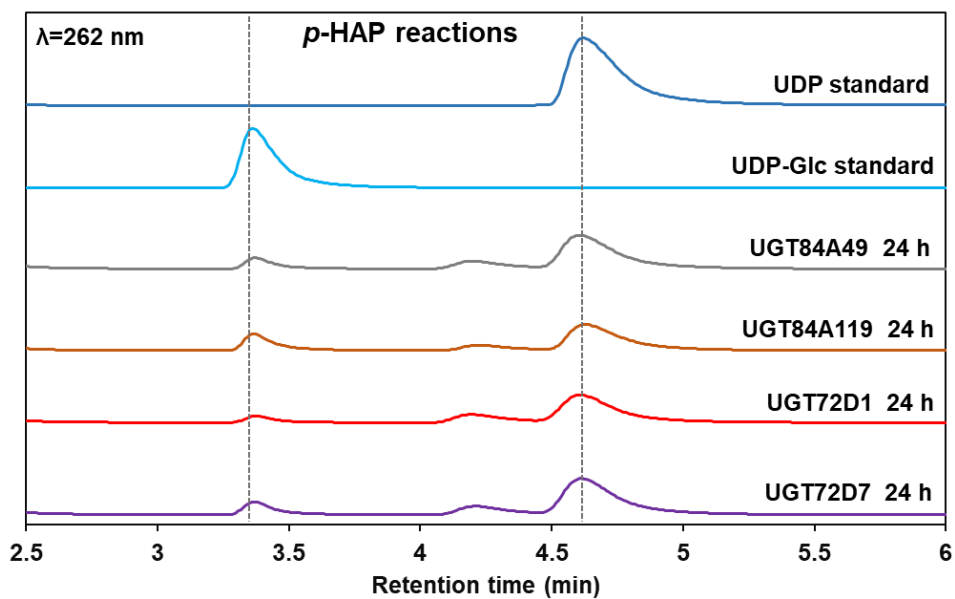

246

247 **Supplementary Figure 8.** Overlay of HPLC chromatograms for UDP/UDP-Glc in UGT  
248 reactions toward *p*-HAP. Reactions (100  $\mu$ L) contained 1.0 mM *p*-HAP, 2.0 mM UDP-Glc and  
249 0.50 mg mL<sup>-1</sup> enzymes in potassium phosphate buffer (50 mM, pH 8.0).

250

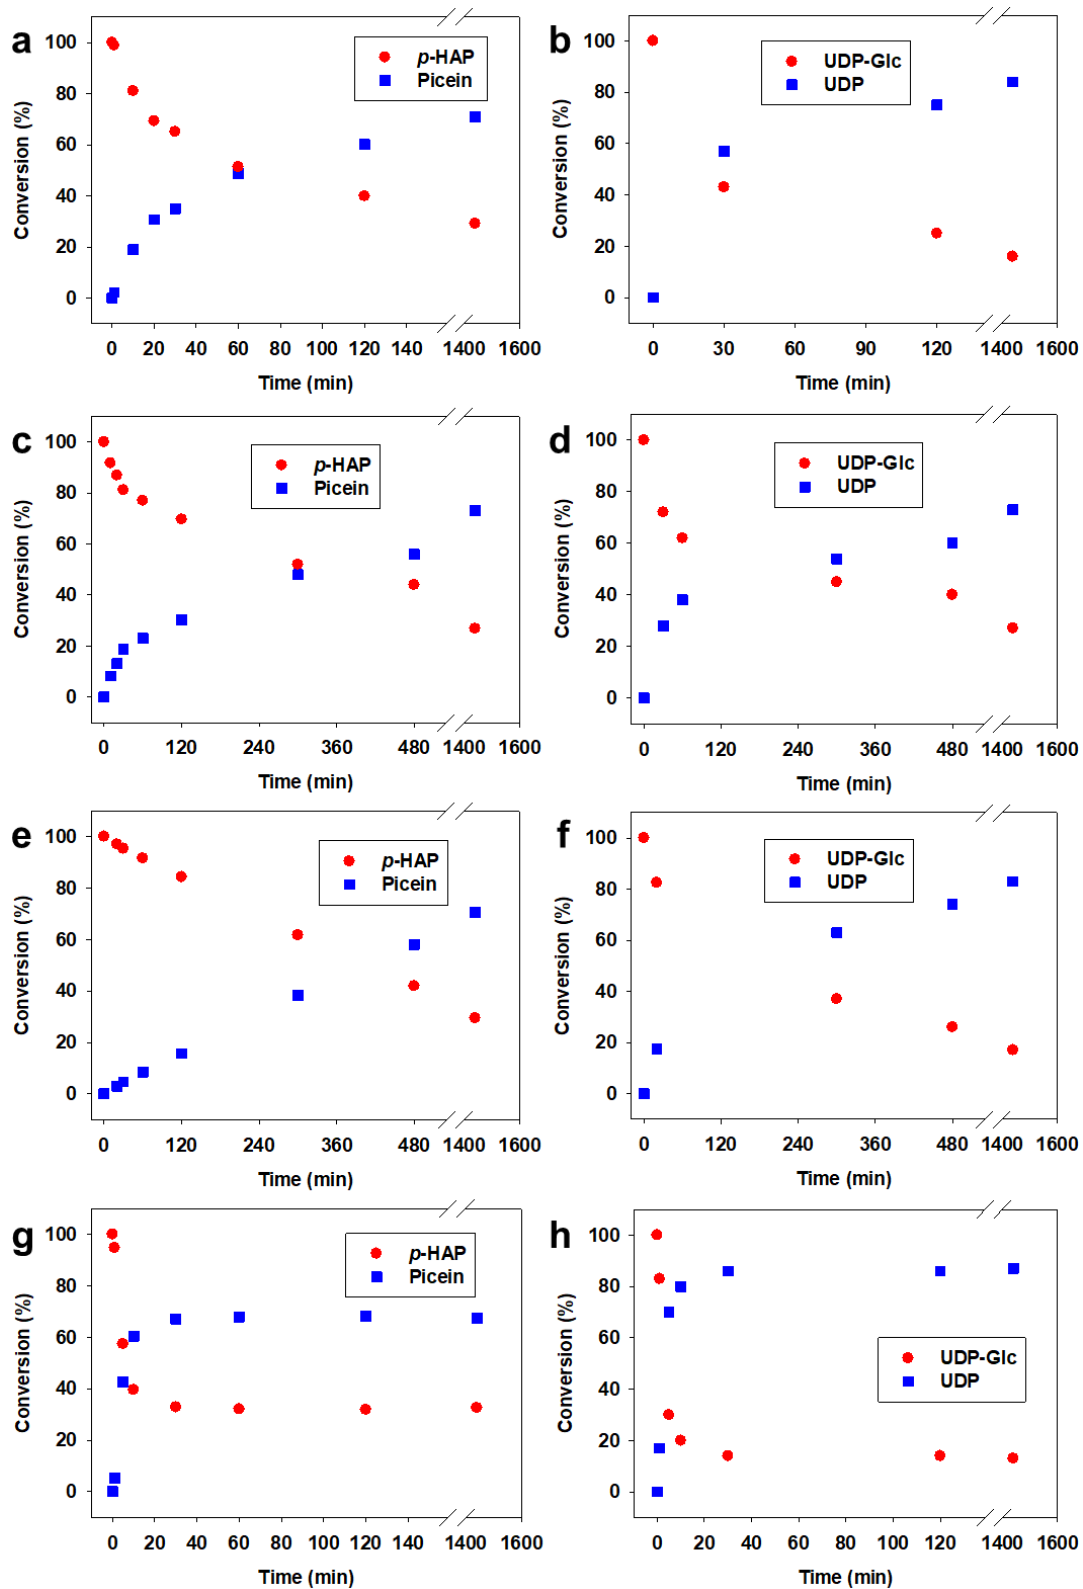

251

252 **Supplementary Figure 9.** Time courses of *p*-HAP/picein and UDP-Glc/UDP in UGT/*p*-HAP  
 253 reactions: UGT84A49 (a, b), UGT84A119 (c, d), UGT72D7 (e, f) and UGT72D1 (g, h)  
 254 reactions. Reactions (100  $\mu$ L) contained 1.0 mM *p*-HAP, 2.0 mM UDP-Glc and 0.50 mg mL<sup>-1</sup>  
 255 enzymes in potassium phosphate buffer (50 mM, pH 8.0).

256

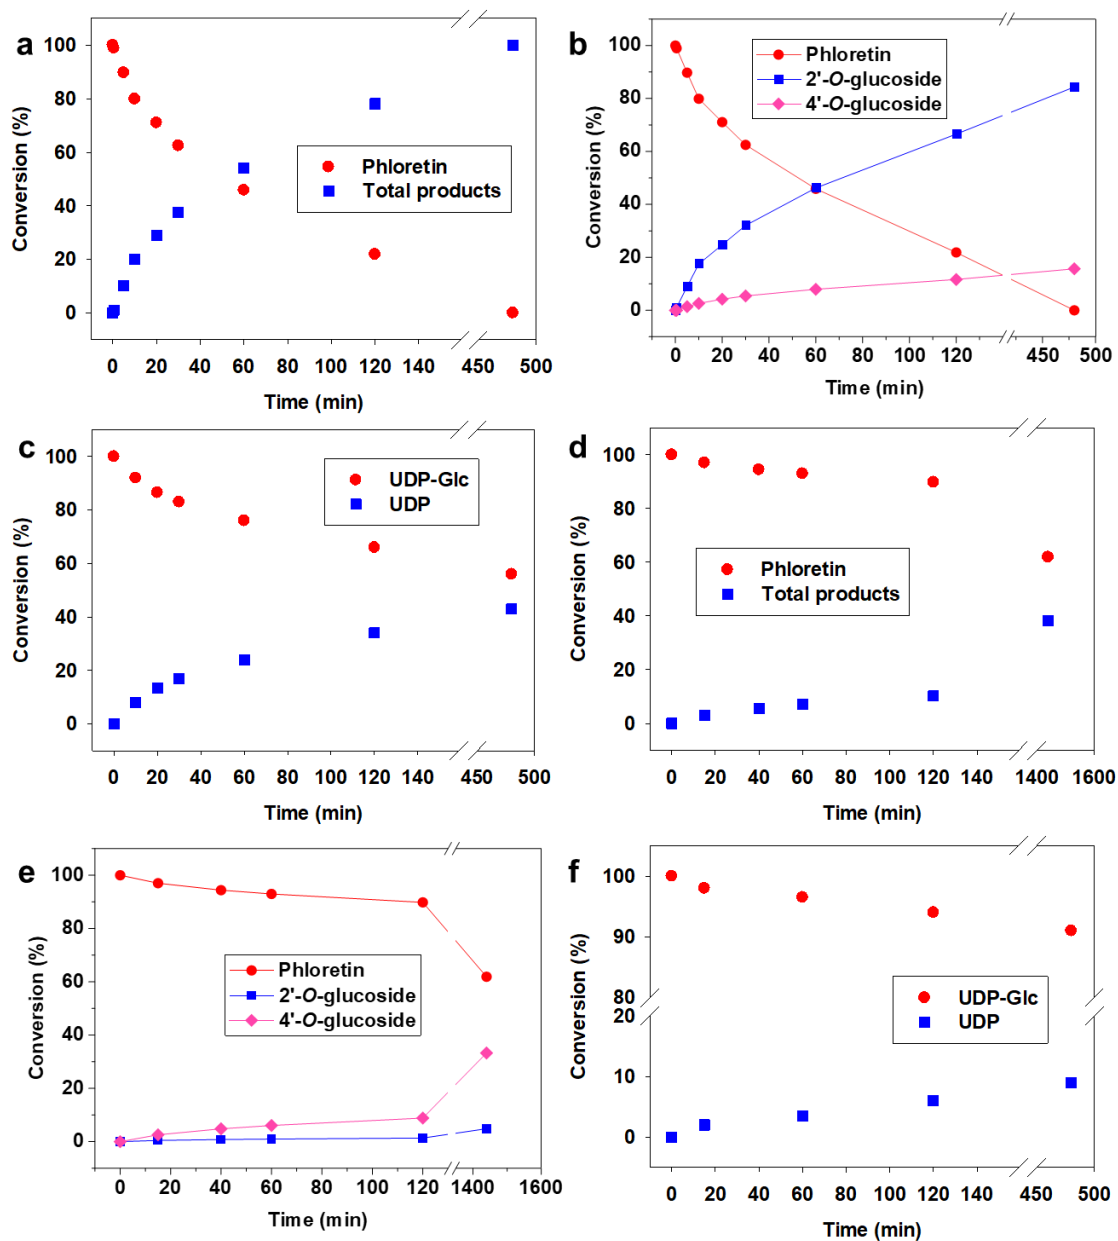

257

258 **Supplementary Figure 10.** Time courses of phloretin/total products, phloretin/individual  
 259 products and UDP-Glc/UDP in UGT/phloretin reactions: UGT72D1 (**a-c**), and UGT84A119  
 260 (**d-f**). Reactions (100  $\mu$ L) contained 1.0 mM phloretin, 2.0 mM UDP-Glc and 0.50 mg mL<sup>-1</sup>  
 261 enzymes in potassium phosphate buffer (50 mM, pH 8.0).

262

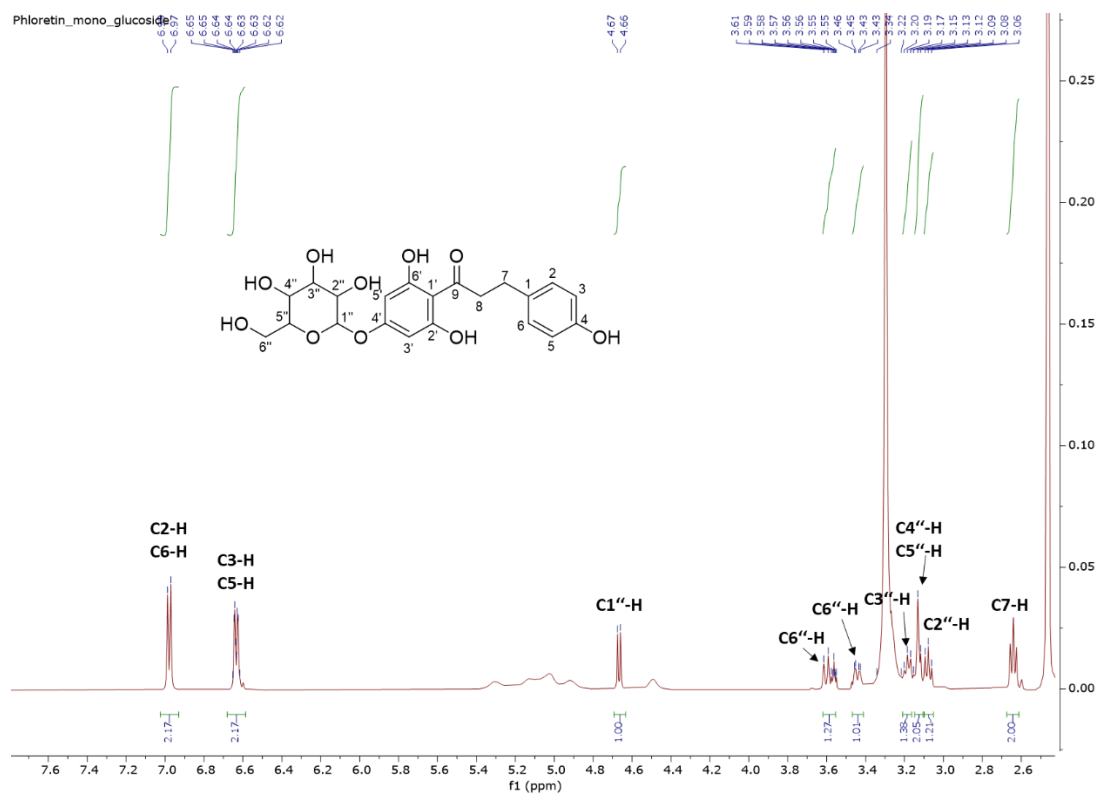

263

264 **Supplementary Figure 11.** <sup>1</sup>H NMR spectrum (500 MHz, D<sub>2</sub>O) of isolated phloretin 4'-O-  
 265 glucoside: δ 6.98 ppm (d, 2H), 6.63 ppm (d, 2H), 4.66 ppm (d, 1H), 3.58 ppm (m, 1H), 3.44  
 266 ppm (m, 1H), 3.19 ppm (m, 1H), 3.13 ppm (m, 2H), 3.08 ppm (t, 1H), 2.63ppm (t, 2H). The  
 267 signal from C8-H is under the signal of water. Absence of the singlet from C3'+C5' is attributed  
 268 to an interference from a paramagnetic ion interacting with the phenolic hydroxyl groups of  
 269 ring A.

270

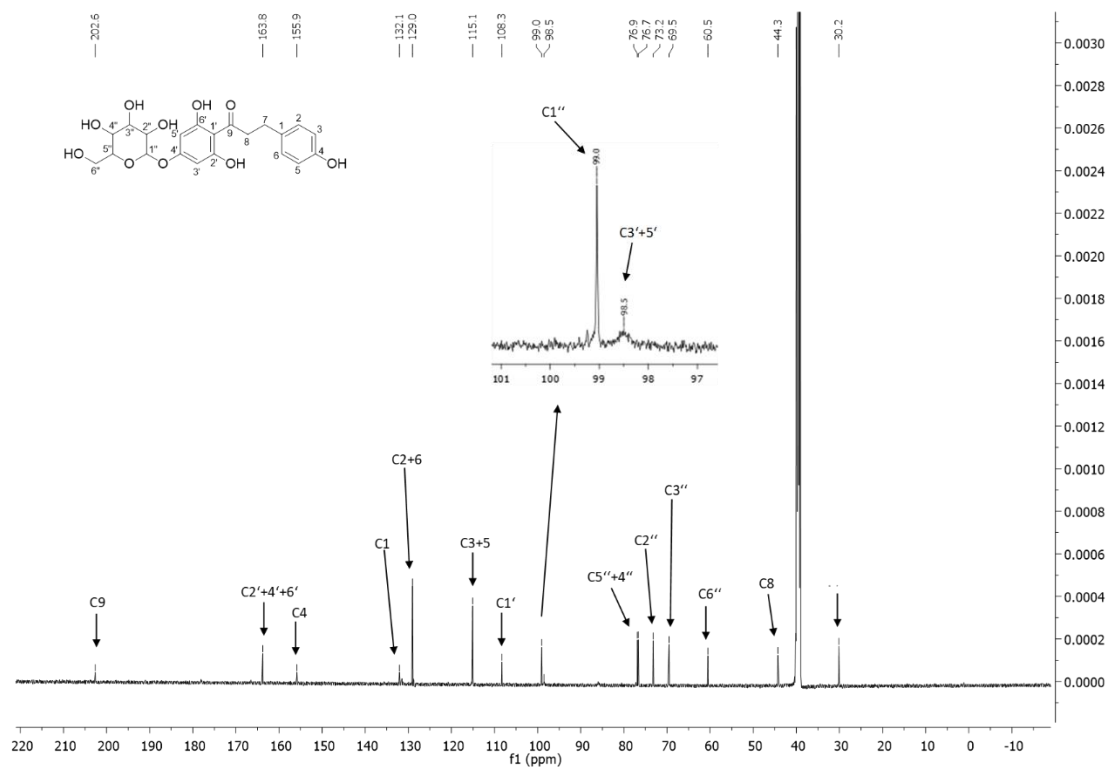

271

272 **Supplementary Figure 12.**  $^{13}\text{C}$  NMR spectrum (500 MHz,  $\text{D}_2\text{O}$ ) of phloretin 4'-O-glucoside.

273 Broadening of the signal from C3'+C5' is attributed to an interference from a paramagnetic ion

274 interacting with the phenolic hydroxyl groups of ring A.

275



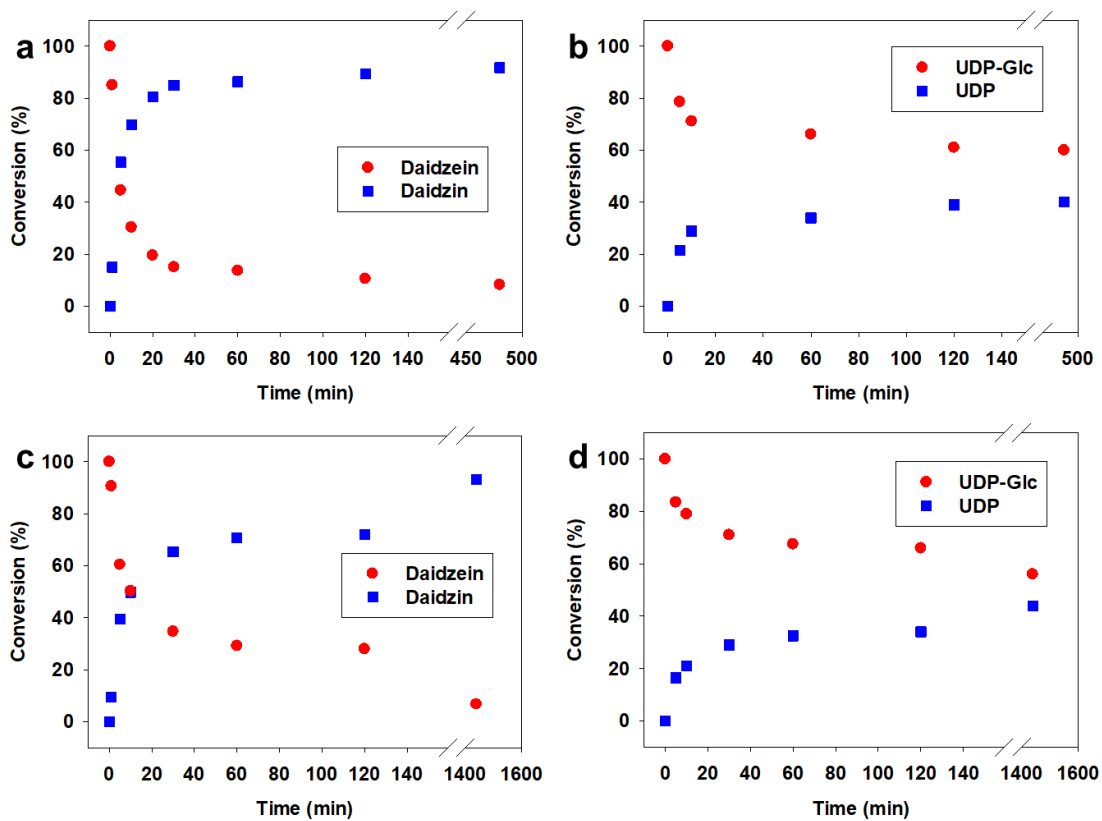

276

277

**Supplementary Figure 13.** Time courses of daidzein/products and UDP-Glc/UDP in

278

UGT/daidzein reactions: UGT84A49 (a, b) and UGT84A119 (c, d). Reactions (100  $\mu$ L)

279

contained 1.0 mM daidzein, 2.0 mM UDP-Glc and 0.50 mg mL<sup>-1</sup> enzymes in potassium

280

phosphate buffer (50 mM, pH 8.0).

281

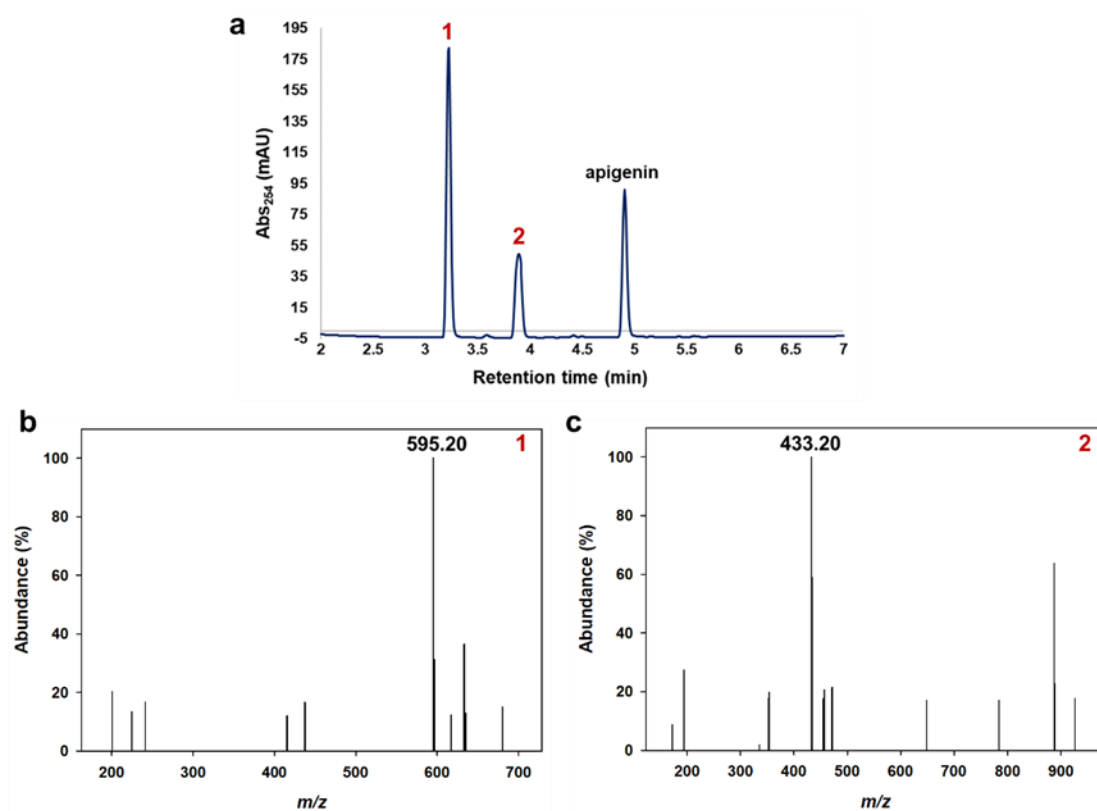

282

283

**Supplementary Figure 14.** Reverse phase HPLC-UV/MS analysis of the UGT84A49 reaction

284

with apigenin at 8 h time point. **a.** HPLC chromatogram of apigenin 7,4'-di-*O*-glucoside (peak

285

1), apigenin 7-*O*-glucoside (peak 2), apigenin 4'-*O*-glucoside (peak 2) and apigenin. Note:

286

Apigenin mono-*O*-glucosides co-elute in peak 2. **b.** Mass spectrum of peak 1 (apigenin 7,4'-di-

287

*O*-glucoside) from chromatogram in **a**; calculated  $[M+H]^+ = 595.15$ , found: 595.20. **c.** Mass

288

spectrum of peak 2 (apigenin 7-*O*-glucoside, apigenin 4'-*O*-glucoside) from chromatogram in

289

**a**, calculated  $[M+H]^+ = 433.11$ , found: 433.20.

290

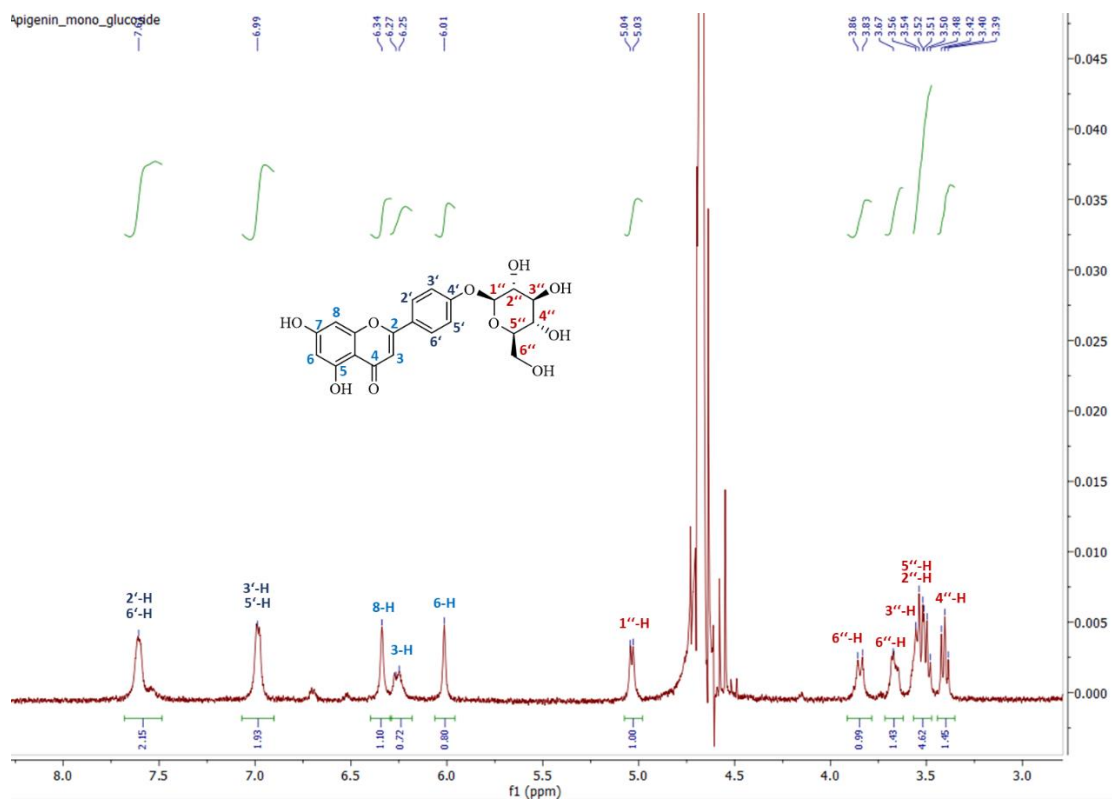

291

292 **Supplementary Figure 15.**  $^1\text{H}$  NMR spectrum (500 MHz, 20% DMSO- $d_6$ ,  $\text{D}_2\text{O}$ ) of isolated  
 293 apigenin 4'-*O*-glucoside:  $\delta$  7.62 ppm (d, 2H), 6.99 ppm (d, 2H), 6.34 ppm (s, 1H), 6.26 ppm (s,  
 294 1H), 6.01 ppm (s, 1H), 5.03 ppm (d, 1H), 3.85 ppm (d, 1H), 3.67 ppm (m, 1H) 3.52 ppm (m,  
 295 3H), 3.40 ppm (t, 1H).

296

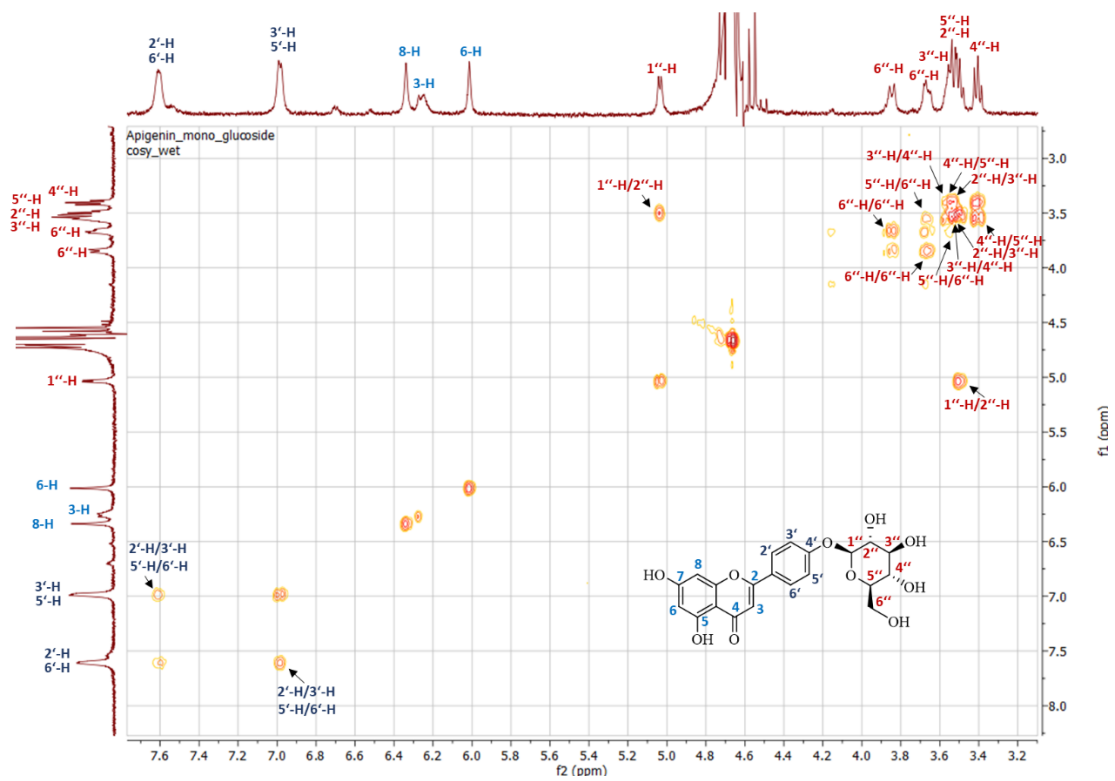

297

298 **Supplementary Figure 16.** Correlated spectroscopy (COSY) analysis of apigenin 4'-O-  
 299 glucoside (500 MHz, 20% DMSO-d<sub>6</sub>, D<sub>2</sub>O).

300

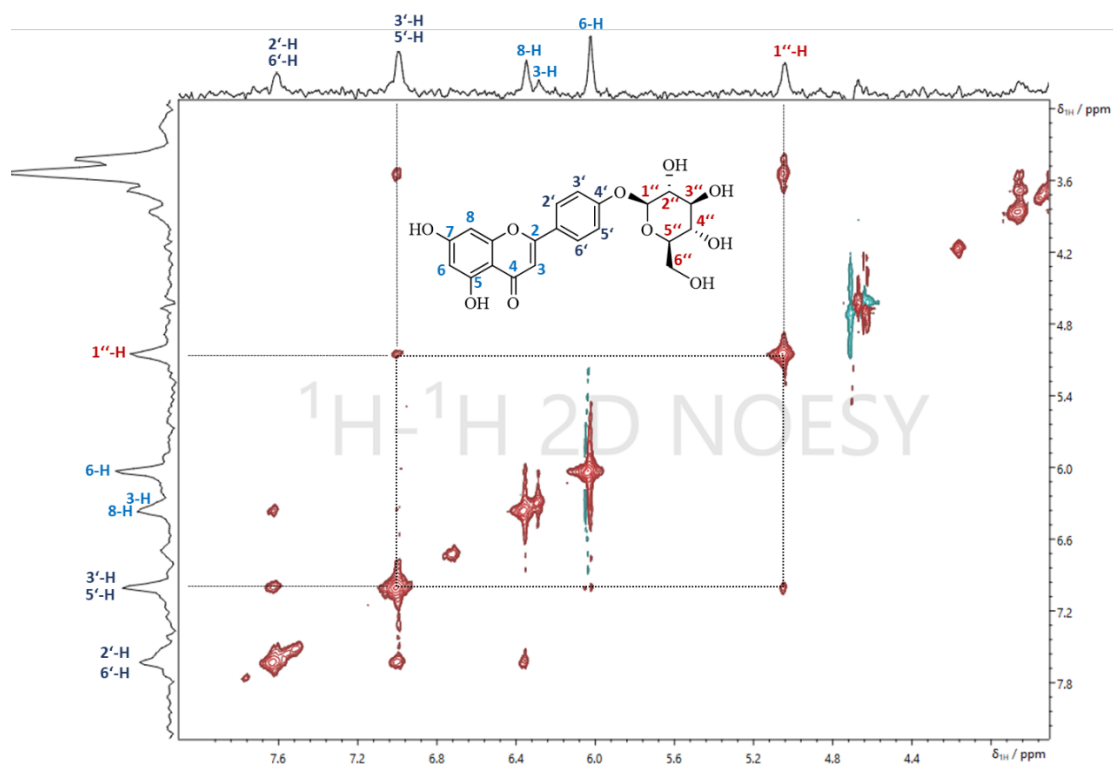

301

302 **Supplementary Figure 17.** 2D NOE spectroscopy (2D NOESY) analysis of apigenin 4'-O-  
 303 glucoside (500 MHz, 20% DMSO-d<sub>6</sub>, D<sub>2</sub>O). A crosspeak is seen between 1''-H (anomeric  
 304 proton) and 3'-H/5'-H (aromatic protons from ring B in ortho position to glucose).

305

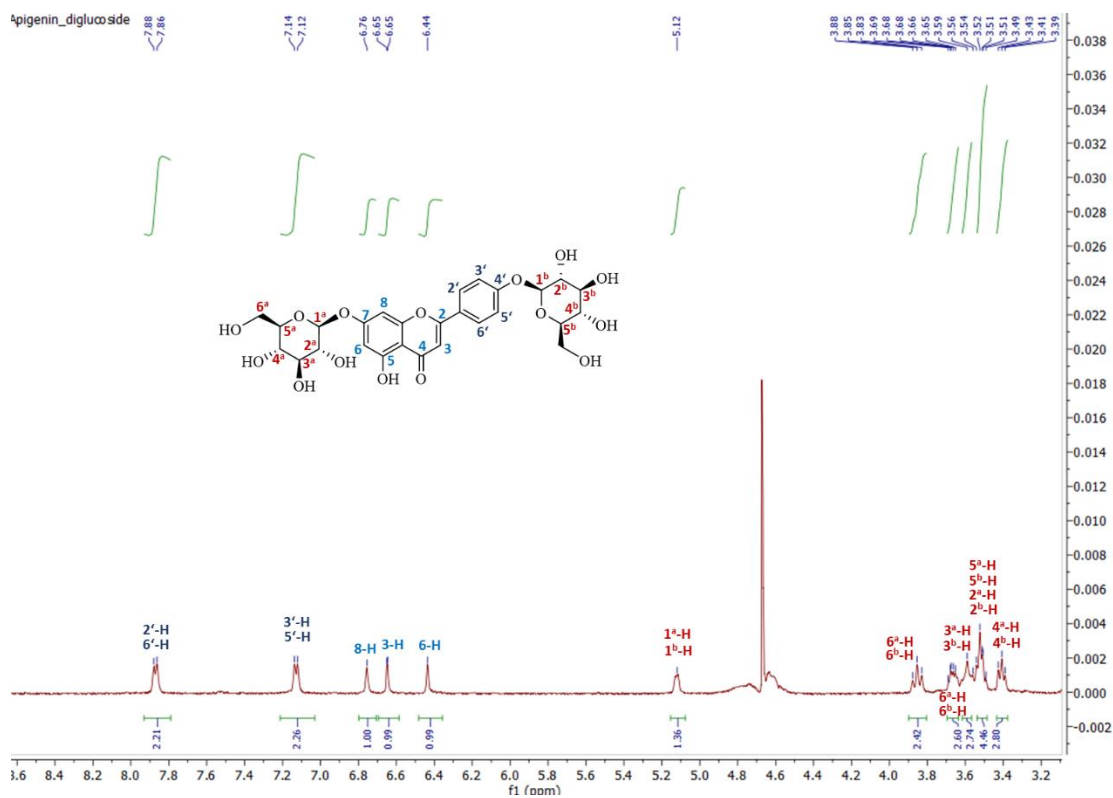

306

307 **Supplementary Figure 18.** <sup>1</sup>H NMR spectrum (500 MHz, 15% DMSO-d<sub>6</sub>, D<sub>2</sub>O) of isolated  
 308 apigenin 7,4'-di-O-glucoside: δ 7.87 ppm (d, 2H), 7.13 ppm (d, 2H), 6.76 ppm (s, 1H), 6.65  
 309 ppm (s, 1H), 6.44 ppm (s, 1H), 5.12 ppm (d, 2H), 3.85 ppm (t, 2H), 3.68 ppm (m, 2H) 3.59 ppm  
 310 (m, 2H), 3.51 ppm (m, 4H), 3.40 ppm (t, 2H).

311

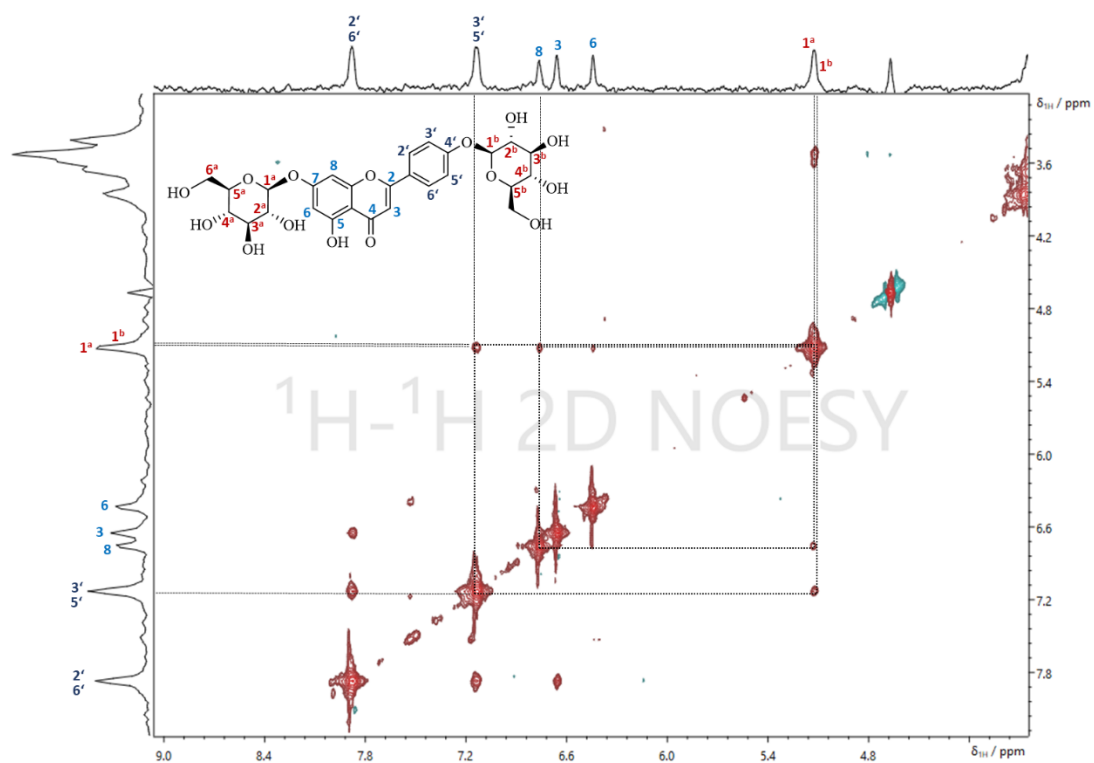

312

313 **Supplementary Figure 19.** 2D NOESY analysis of apigenin 7,4'-di-*O*-glucoside (500 MHz,  
 314 15% DMSO-d<sub>6</sub>, D<sub>2</sub>O). Crosspeaks are seen between 1<sup>a</sup>-H (anomeric proton from glucose at 7-  
 315 *O*) and 8-H, and between 1<sup>b</sup>-H (anomeric proton from glucose at 4'-*O*) and 3'-H/5'-H.

316

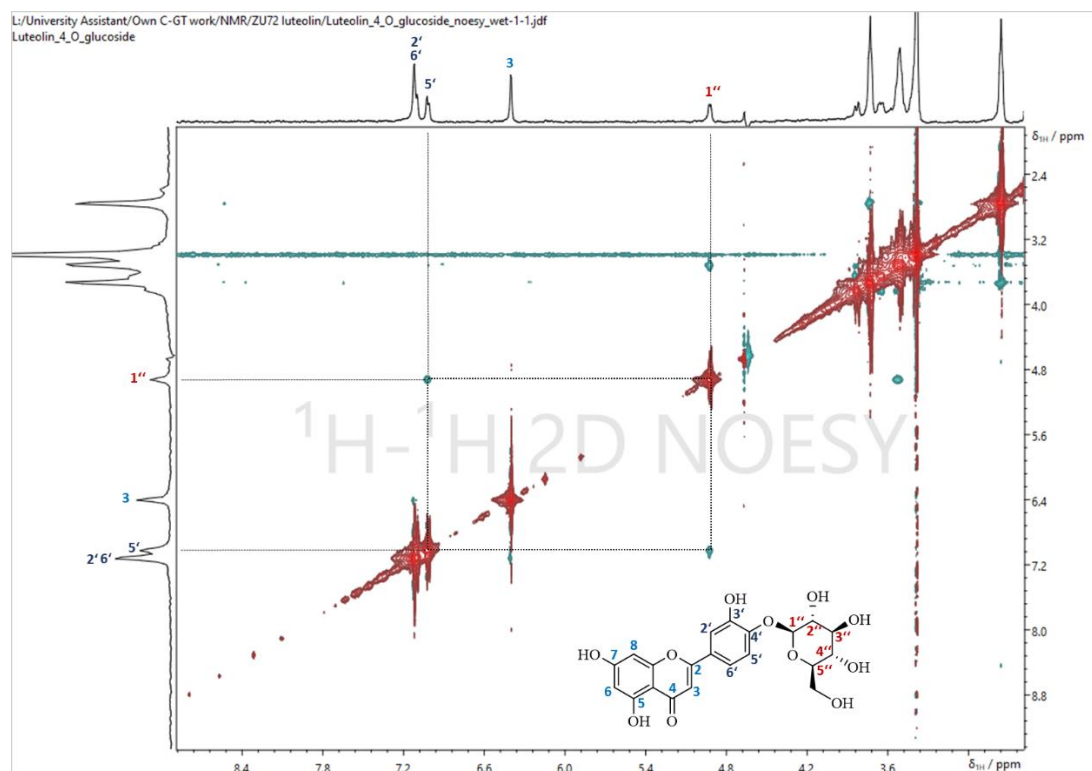

317

318 **Supplementary Figure 20.** 2D NOESY analysis of luteolin 4'-*O*-glucoside (500 MHz, 15%  
 319 DMSO-d<sub>6</sub>, D<sub>2</sub>O). A crosspeak is seen between 1''-H (anomeric proton) and 5'-H (ring B  
 320 aromatic proton in ortho position to glucose). The missing signals from 6-H and 8-H are  
 321 attributed to an interference from a paramagnetic ion interacting with the hydroxyl groups of  
 322 ring A.

323



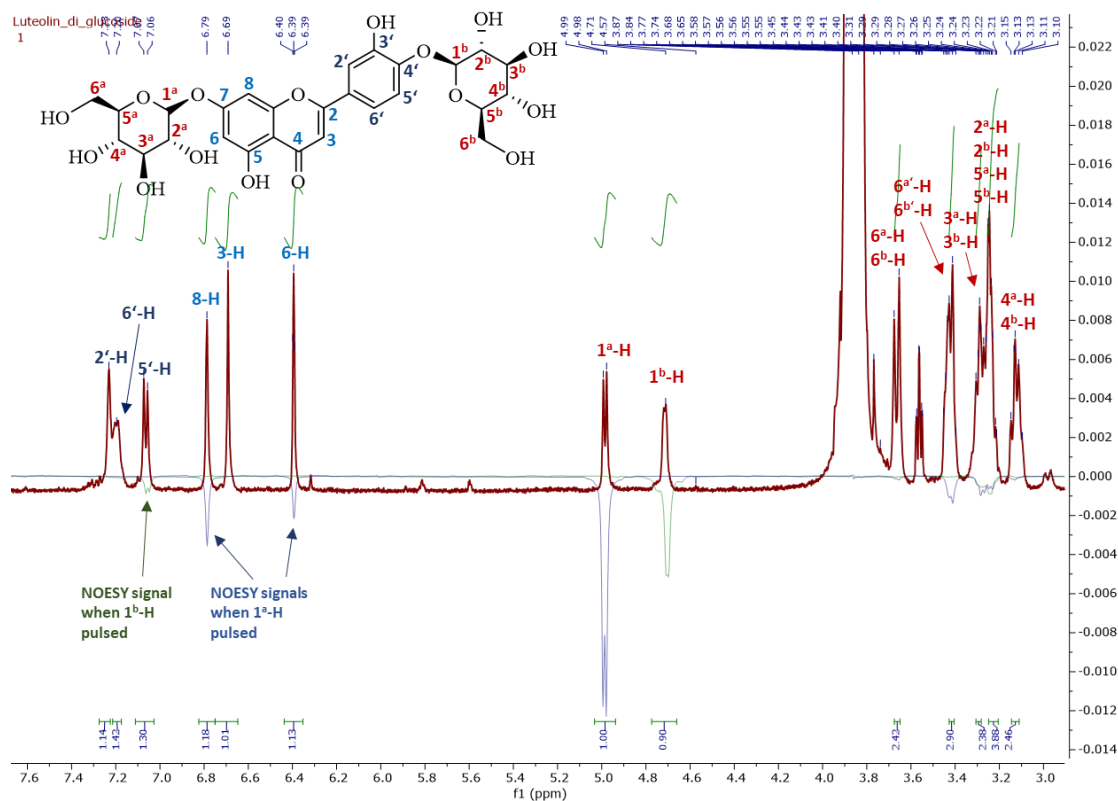

324

325 **Supplementary Figure 21.** Overlay of 1D NOESY and <sup>1</sup>H NMR spectra (500 MHz, 10%  
 326 DMSO-d<sub>6</sub>, D<sub>2</sub>O) of isolated luteolin-7,4'-di-O-glucoside. δ 7.25 ppm (s, 1H), 7.20 ppm (d, 1H),  
 327 7.06 ppm (d, 1H), 6.79 ppm (s, 1H), 6.69 ppm (s, 1H), 6.39 ppm (s, 1H), 4.98 ppm (d, 1H),  
 328 4.71 ppm (s, 1H), 3.65 ppm (d, 2H), 3.45 ppm (m, 2H), 3.25 ppm (m, 6H), 3.13 ppm (t, 1H).  
 329 1D NOESY spectrum shows the appearing signals 8-H and 6-H upon pulsing the anomeric  
 330 proton 1<sup>a</sup>-H, and the signal 5'-H upon pulsing the anomeric proton 1<sup>b</sup>-H.

331

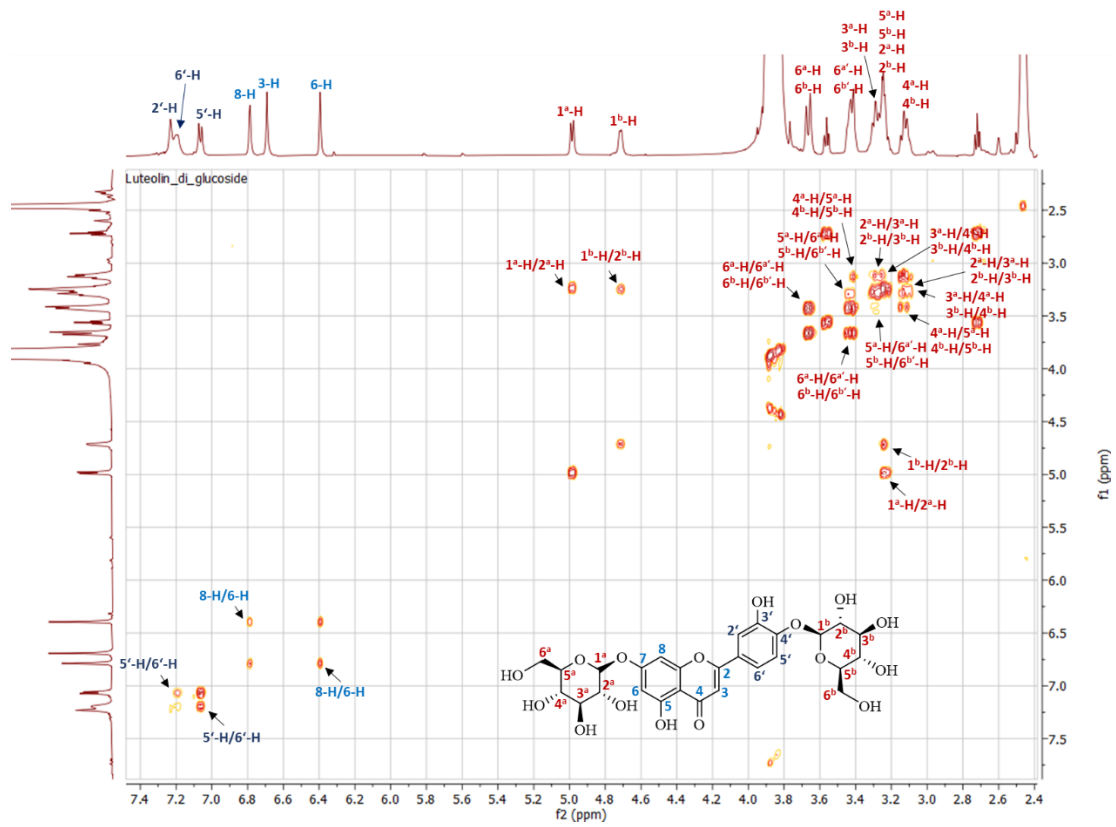

332

333 **Supplementary Figure 22.** COSY analysis of luteolin-7,4'-di-O-glucoside (500 MHz, 10%

334 DMSO-d<sub>6</sub>, D<sub>2</sub>O).

335

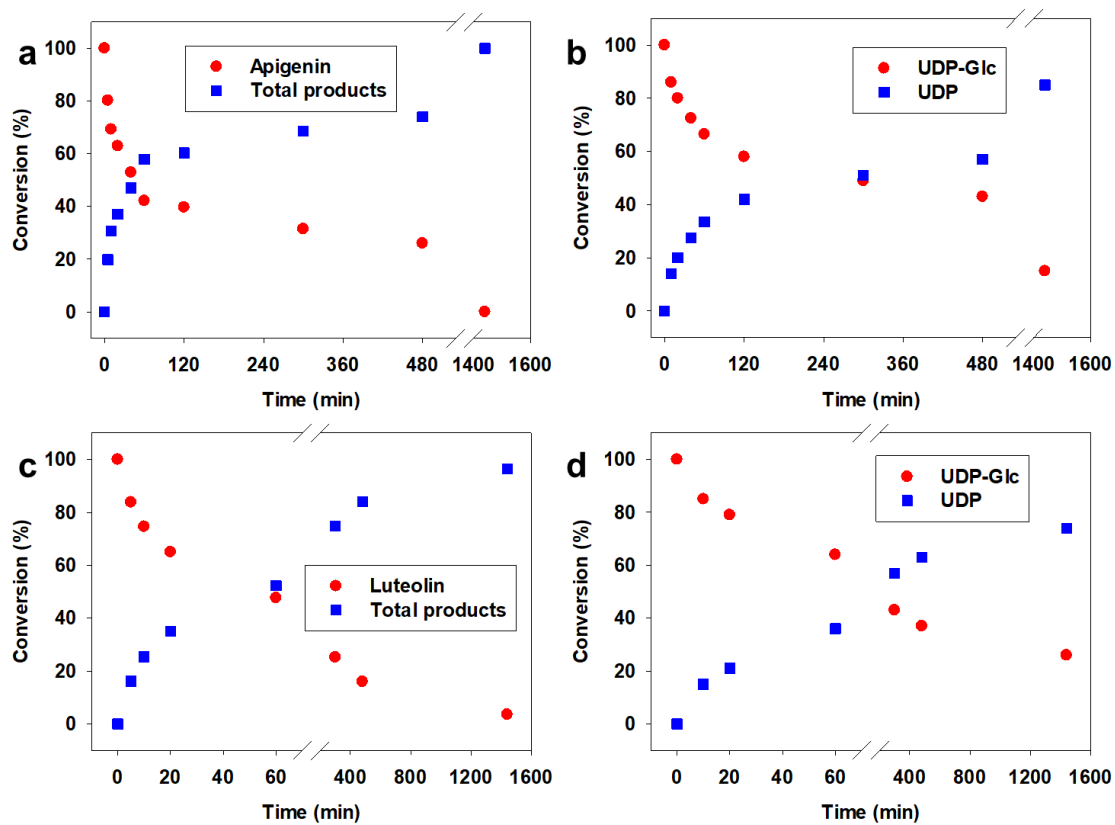

336

337 **Supplementary Figure 23.** Time courses of acceptor substrates/total products and UDP-  
 338 Glc/UDP in UGT84A49 reactions toward apigenin (a, b) and luteolin (c, d). Reactions (100  $\mu$ L)  
 339 contained 1.0 mM apigenin or luteolin, 2.0 mM UDP-Glc and 0.50 mg mL<sup>-1</sup> UGT84A49 in  
 340 potassium phosphate buffer (50 mM, pH 8.0).

341

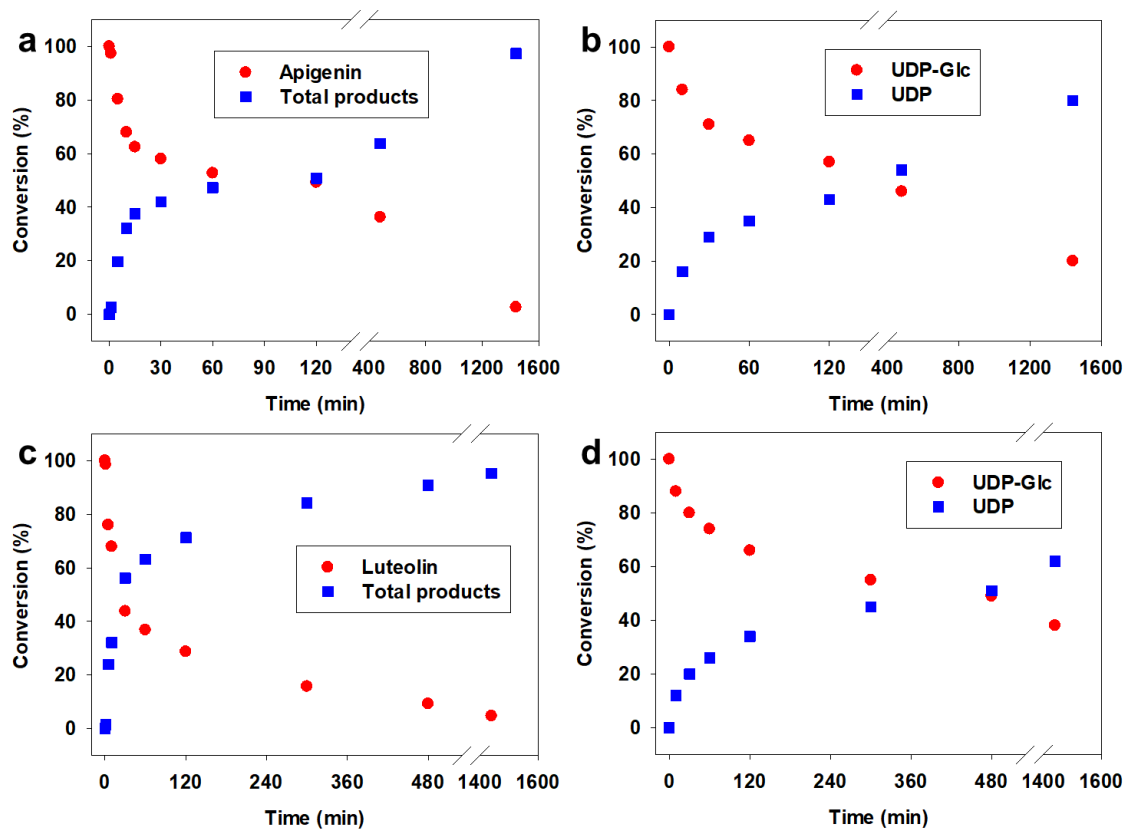

342

343

**Supplementary Figure 24.** Time courses of acceptor substrates/total products and UDP-

344

Glc/UDP in UGT84A119 reactions toward apigenin (**a, b**) and luteolin (**c, d**). Reactions (100

345

$\mu\text{L}$ ) contained 1.0 mM apigenin or luteolin, 2.0 mM UDP-Glc and  $0.50 \text{ mg mL}^{-1}$  UGT84A119

346

in potassium phosphate buffer (50 mM, pH 8.0).

347

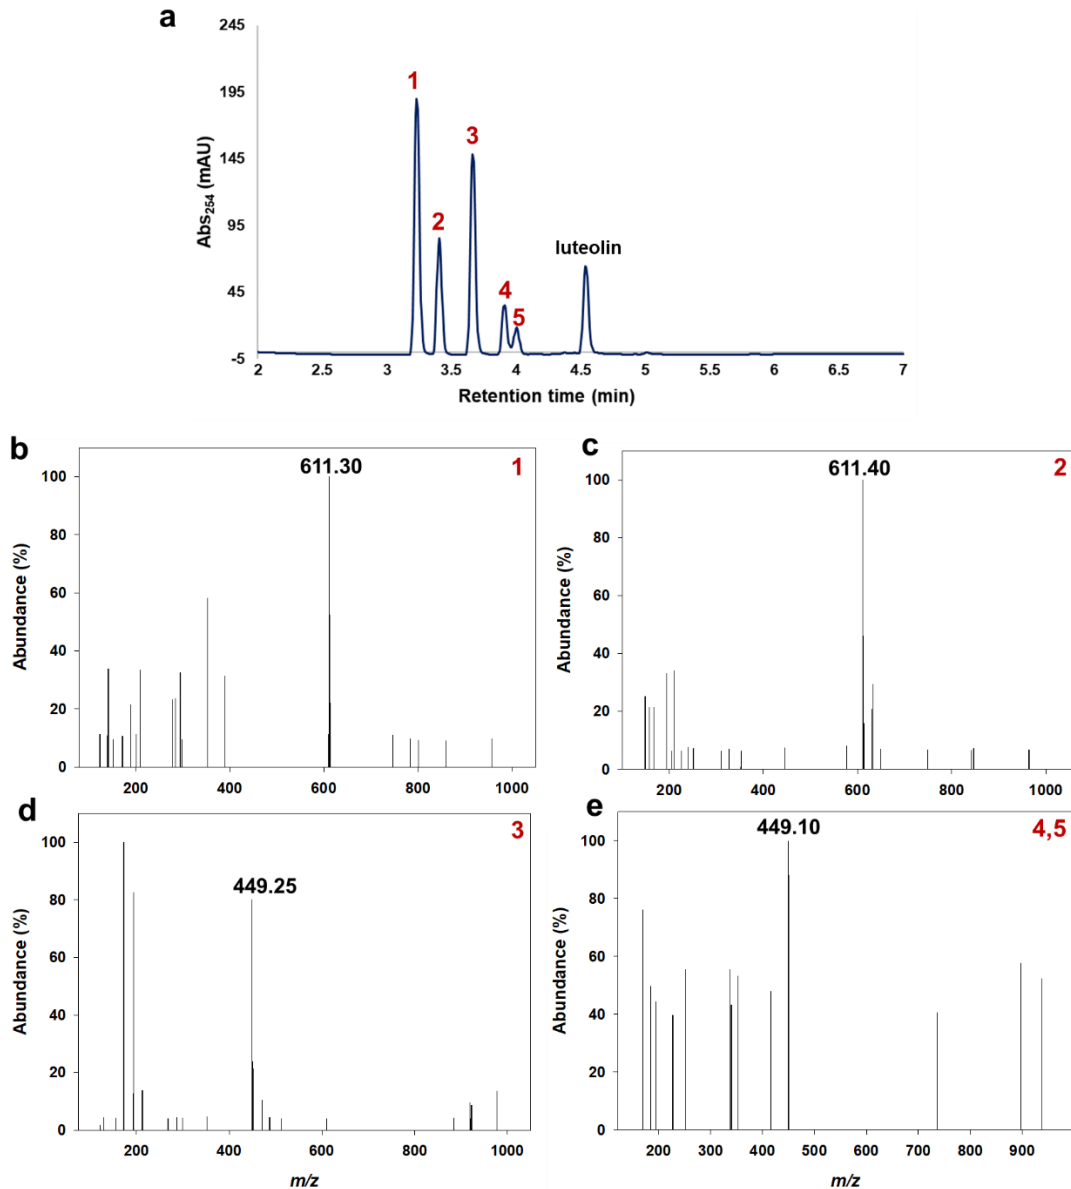

348

349

350 **Supplementary Figure 25.** Reverse phase HPLC-UV/MS analysis of the UGT84A119

351 reaction with luteolin at 8 h time point. **a.** HPLC chromatogram of luteolin 7,4'-di-*O*-glucoside

352 (peak 1), luteolin 7,3'-di-*O*-glucoside (peak 2), luteolin 7-*O*-glucoside (peak 3), luteolin 4'-*O*-

353 glucoside (peak 4), luteolin 3'-*O*-glucoside (peak 5) and luteolin. **b.** Mass spectrum of peak 1

354 (luteolin 7,4'-di-*O*-glucoside) from chromatogram in **a**; calculated  $[M+H]^+ = 611.15$ , found:

355 611.30. **c.** Mass spectrum of peak 2 (luteolin 7,3'-di-*O*-glucoside) from chromatogram in **a**,

356 calculated  $[M+H]^+ = 611.15$ , found: 611.40. **d.** Mass spectrum of peak 3 (luteolin 7-*O*-

357 glucoside) from chromatogram in **a**, calculated  $[M+H]^+ = 449.10$ , found: 449.25. **d.** Mass

358 spectrum of peaks 4 and 5 (luteolin 4'-*O*-glucoside, luteolin 3'-*O*-glucoside) from

359 chromatogram in **a**, calculated  $[M+H]^+ = 449.10$ , found: 449.10.

360

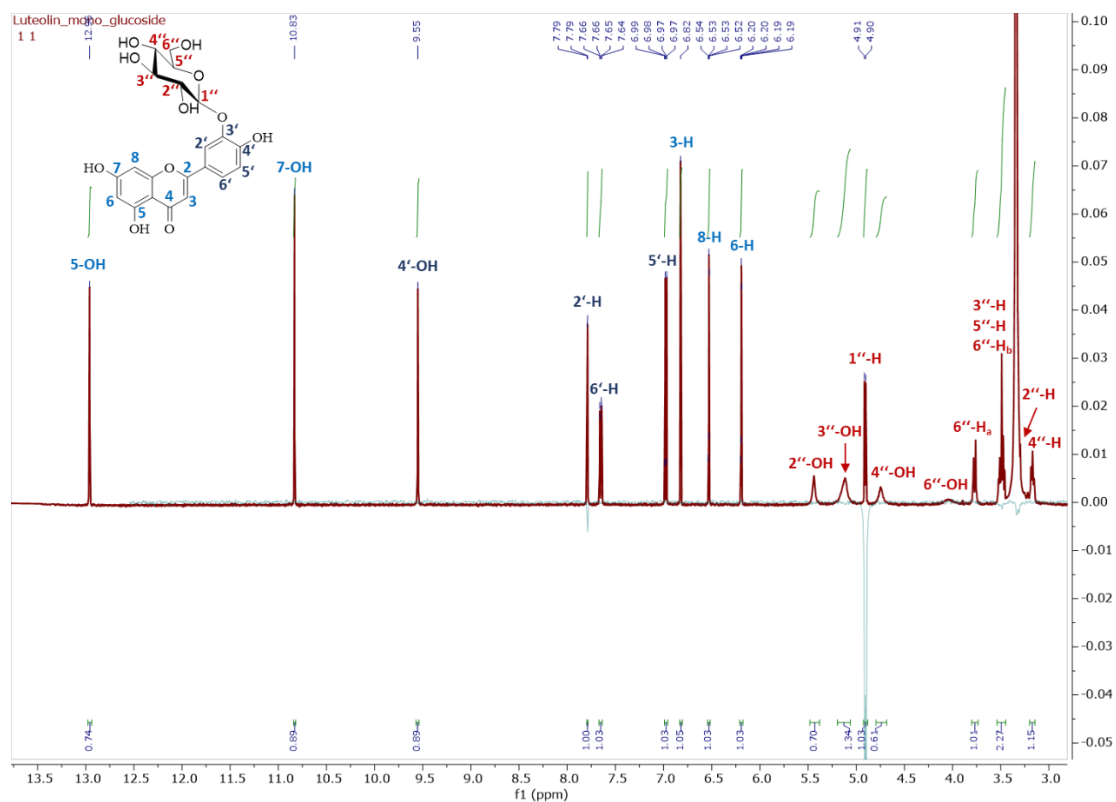

361

362 **Supplementary Figure 26.** Overlay of 1D NOESY and <sup>1</sup>H NMR spectra (500 MHz, DMSO-  
 363 d6) of isolated luteolin 3'-O-glucoside. δ 12.96 ppm (-OH), 10.83 ppm (-OH), 9.55 ppm (-OH),  
 364 7.79 ppm (s, 1H), 7.65 ppm (d, 1H), 6.82 ppm (s, 1H), 6.53 ppm (s, 1H), 6.19 ppm (s, 1H), 5.45  
 365 ppm (s, OH), 5.15 ppm (s, -OH), 4.90 ppm (d, 1H), 4.73 ppm (s, -OH), 4.10 ppm (s, -OH), 3.75  
 366 ppm (d, 1H), 3.50 ppm (m, 3H), 3.30 ppm (m, 1H), 3.20 ppm (t, 1H). 1D NOESY spectrum  
 367 shows the appearing signal of 2'-H upon pulsing the anomeric proton 1''-H.

368

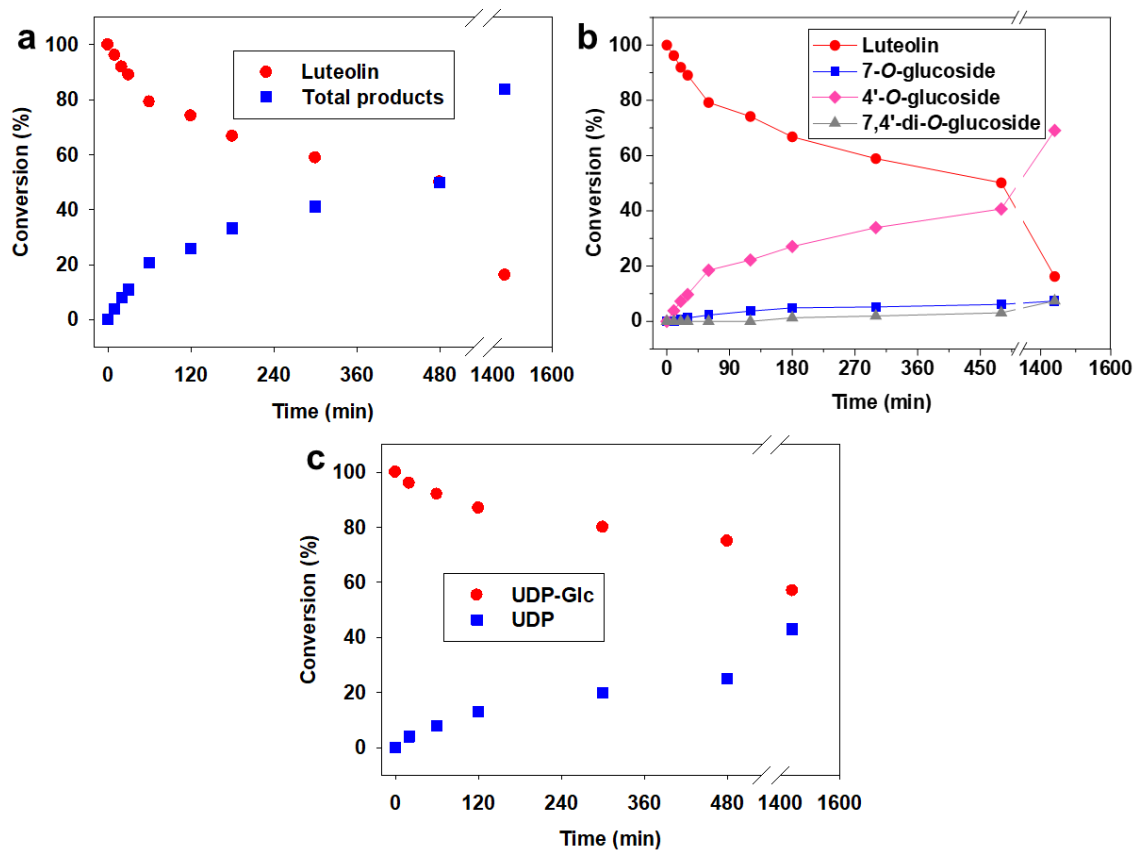

369

370 **Supplementary Figure 27.** Time courses of luteolin/total products (a), luteolin/individual  
 371 products (b) and UDP-Glc/UDP (c) in UGT72D7 reactions toward luteolin. Reactions (100  $\mu$ L)  
 372 contained 1.0 mM luteolin, 2.0 mM UDP-Glc and 0.50 mg mL<sup>-1</sup> UGT72D7 in potassium  
 373 phosphate buffer (50 mM, pH 8.0).

374

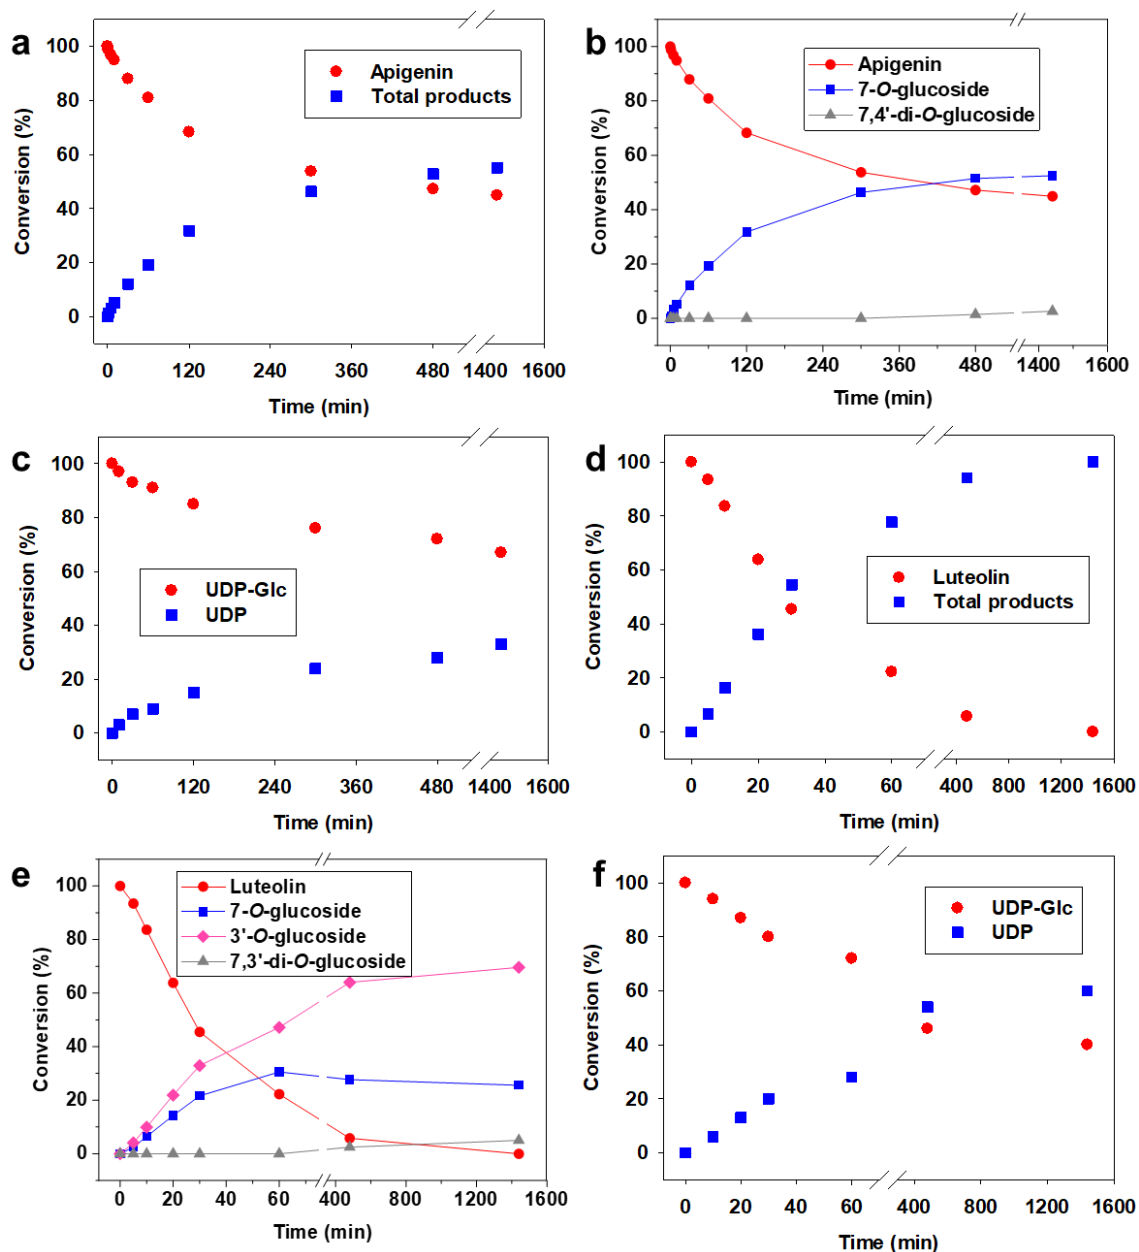

375

376 **Supplementary Figure 28.** Time courses of acceptor substrates/total products, acceptor  
 377 substrates/individual products and UDP-Glc/UDP in UGT72D1 reactions. **a.** Apigenin/total  
 378 products, **b.** apigenin/individual products, and **c.** UDP-Glc/UDP in UGT72D1/apigenin  
 379 reactions. **d.** Luteolin/total products, **e.** luteolin/individual products, and **f.** UDP-Glc/UDP in  
 380 UGT72D1/luteolin reactions. Reactions (100  $\mu$ L) contained 1.0 mM apigenin or luteolin, 2.0  
 381 mM UDP-Glc and 0.50 mg mL<sup>-1</sup> UGT72D1 in potassium phosphate buffer (50 mM, pH 8.0).

382



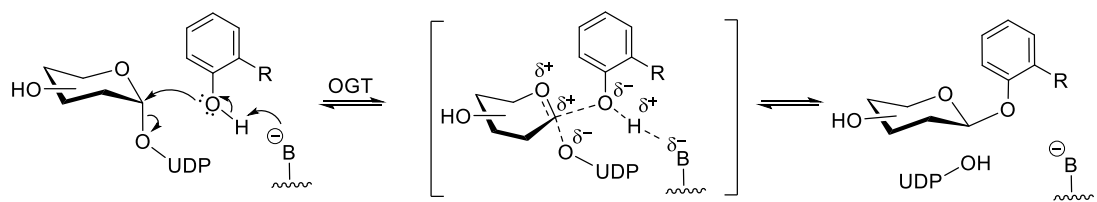

383

384 **Supplementary Figure 29.** Proposed reaction mechanism for an inverting *O*-  
 385 glycosyltransferase (OGT) from the UGT family<sup>2</sup>. B = active site base, typically histidine.

386

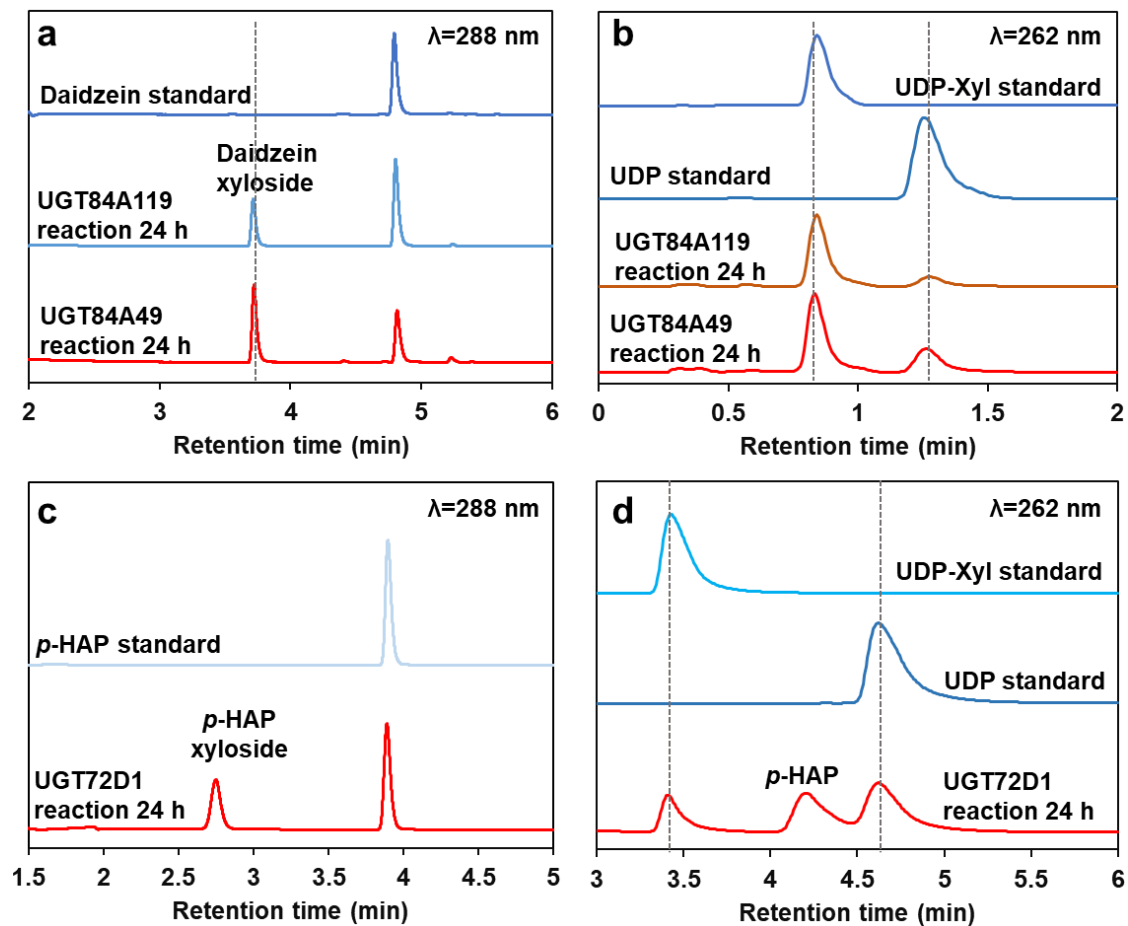

387

388 **Supplementary Figure 30.** Overlay of HPLC chromatograms for acceptor substrates/xylosides  
 389 and UDP-Xyl/UDP in UGT reactions: UGT84A119 and UGT84A49 with daidzein/UDP-Xyl  
 390 (**a**, **b**) and UGT72D1 with *p*-HAP/UDP-Xyl (**c**, **d**). Reactions (100  $\mu$ L) contained 1.0 mM  
 391 acceptor substrates, 2.0 mM UDP-Xyl and 0.50 mg mL<sup>-1</sup> enzymes in potassium phosphate  
 392 buffer (50 mM, pH 8.0).

393

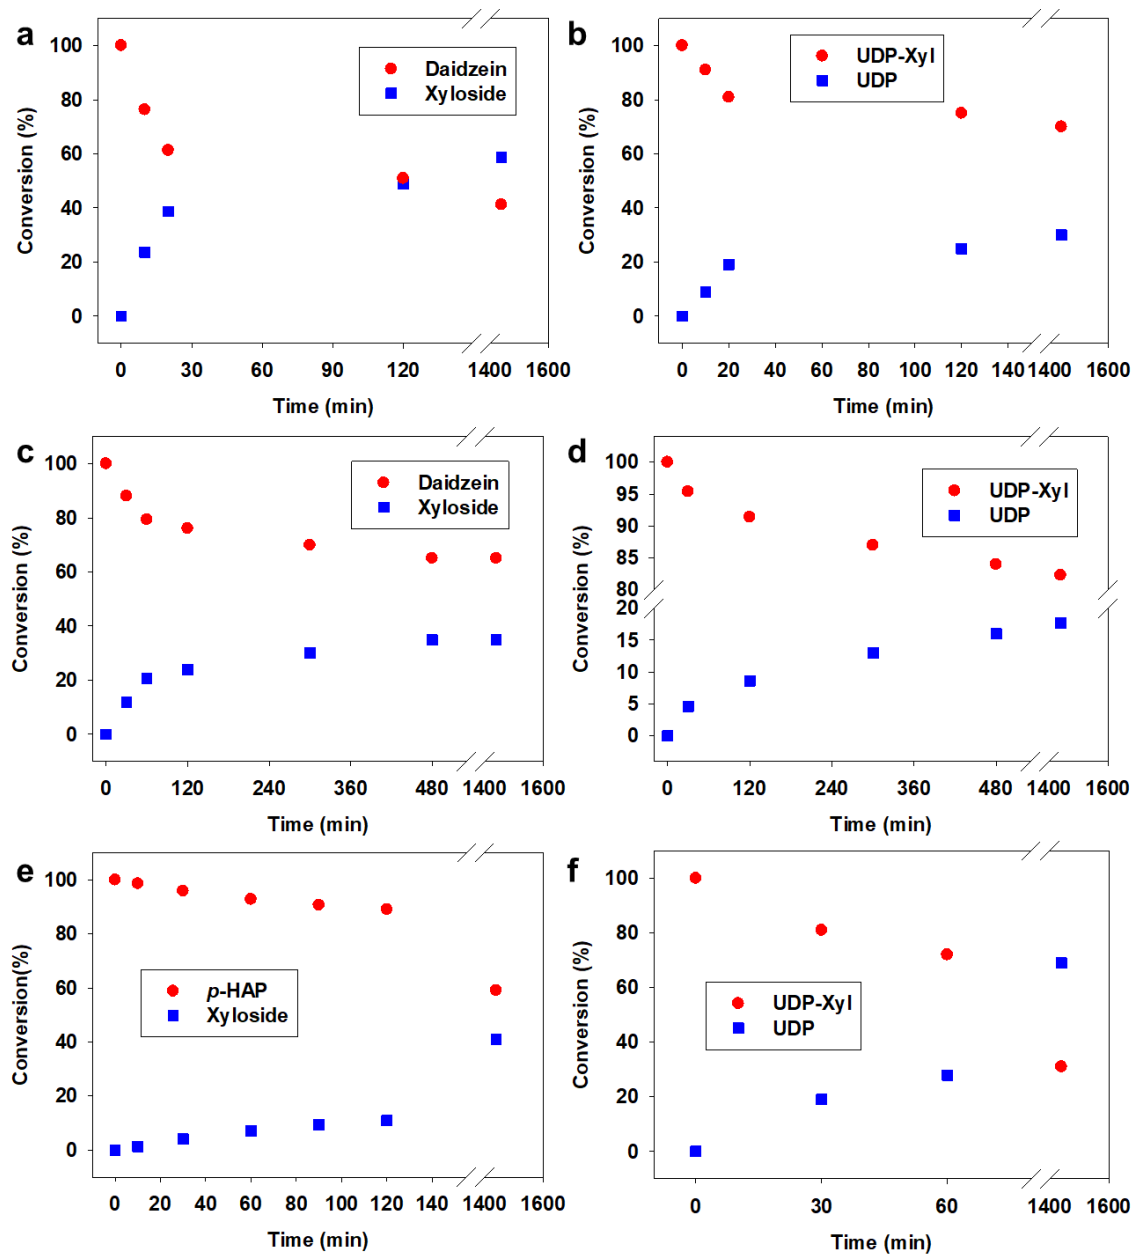

394

395 **Supplementary Figure 31.** Time courses of acceptor substrates/xylosides and UDP-Xyl/UDP  
 396 in UGT reactions. **a.** Daidzein/xyloside, and **b.** UDP-Xyl/UDP in UGT84A49/daidzein/UDP-  
 397 Xyl reactions. **c.** Daidzein/xyloside, and **d.** UDP-Xyl/UDP in UGT84A119/daidzein/UDP-Xyl  
 398 reactions. **e.** *p*-HAP/xyloside, and **f.** UDP-Xyl/UDP in UGT72D1/*p*-HAP/UDP-Xyl reactions.  
 399 Reactions (100  $\mu$ L) contained 1.0 mM acceptor substrates, 2.0 mM UDP-Xyl and 0.50 mg mL<sup>-1</sup>  
 400 <sup>1</sup> UGT in potassium phosphate buffer (50 mM, pH 8.0).

401

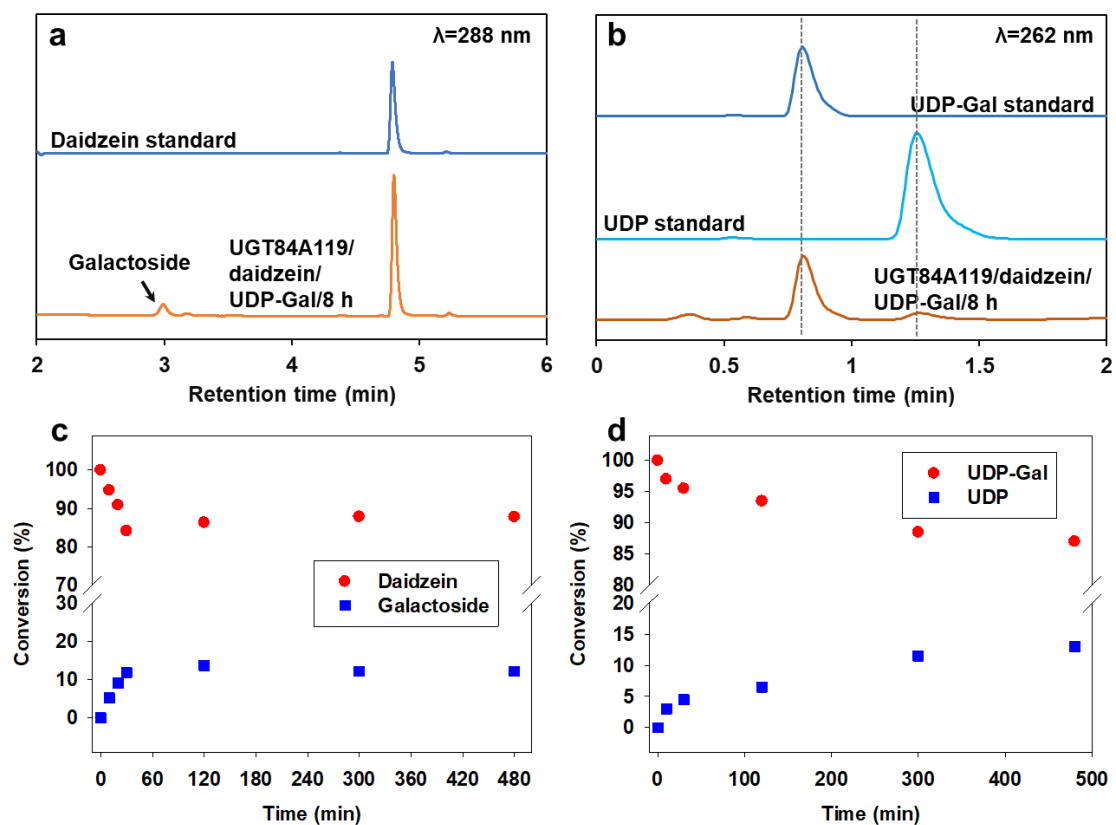

402

403

**Supplementary Figure 32.** Overlay of HPLC chromatograms for acceptor substrate/galactoside (a), UDP-Gal/UDP (b), and time courses of daidzein/galactoside (c) and UDP-Gal/UDP (d) in UGT84A119 reactions toward daidzein/UDP-Gal. Reactions (100  $\mu$ L) contained 1.0 mM daidzein, 2.0 mM UDP-Gal and 0.50 mg mL<sup>-1</sup> UGT84A119 in potassium phosphate buffer (50 mM, pH 8.0).

408

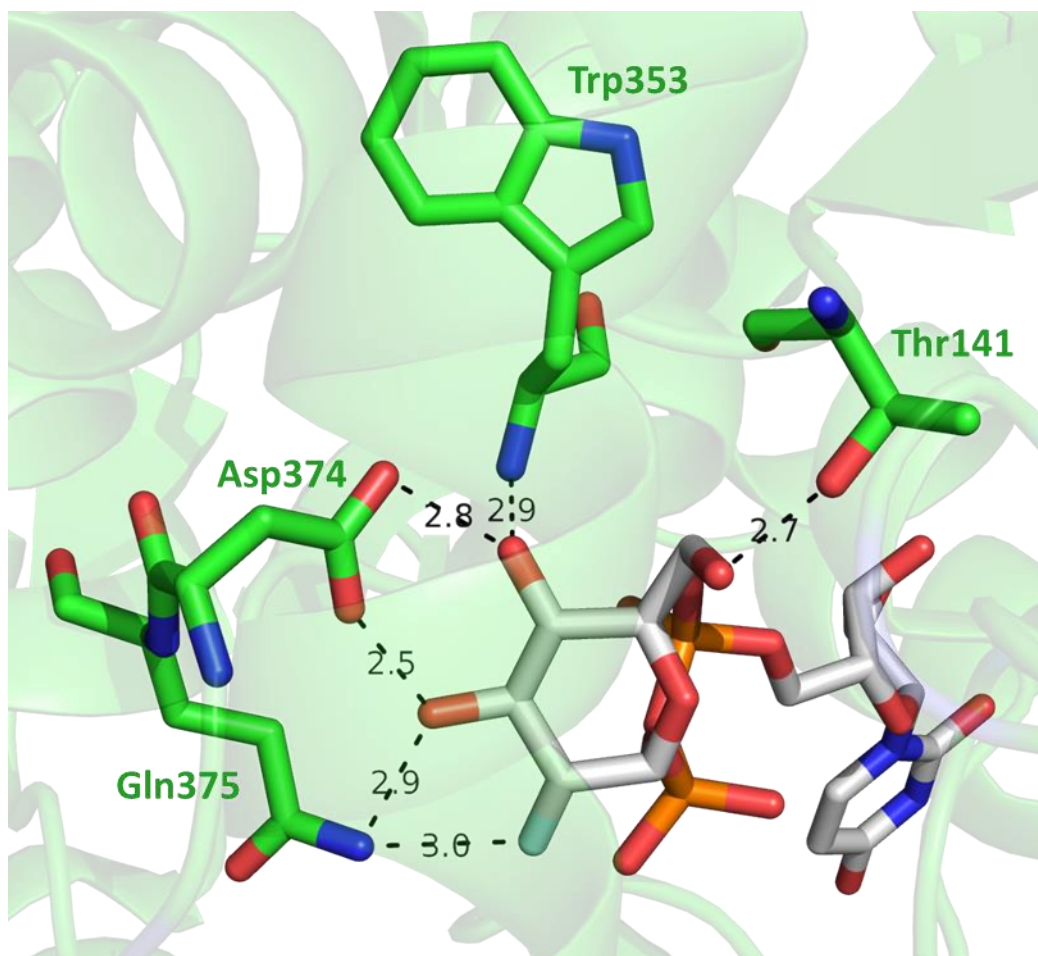

409

410 **Supplementary Figure 33.** Active site close-up into the donor binding site of the Michaelis  
411 complex of VvGT1<sup>3</sup> (PDB: 2C1Z) with UDP-2-deoxy-2-fluoro-glucose (gray carbons) showing  
412 the conserved residues Gln-Asp-Trp-Thr for the binding of glucose.

413

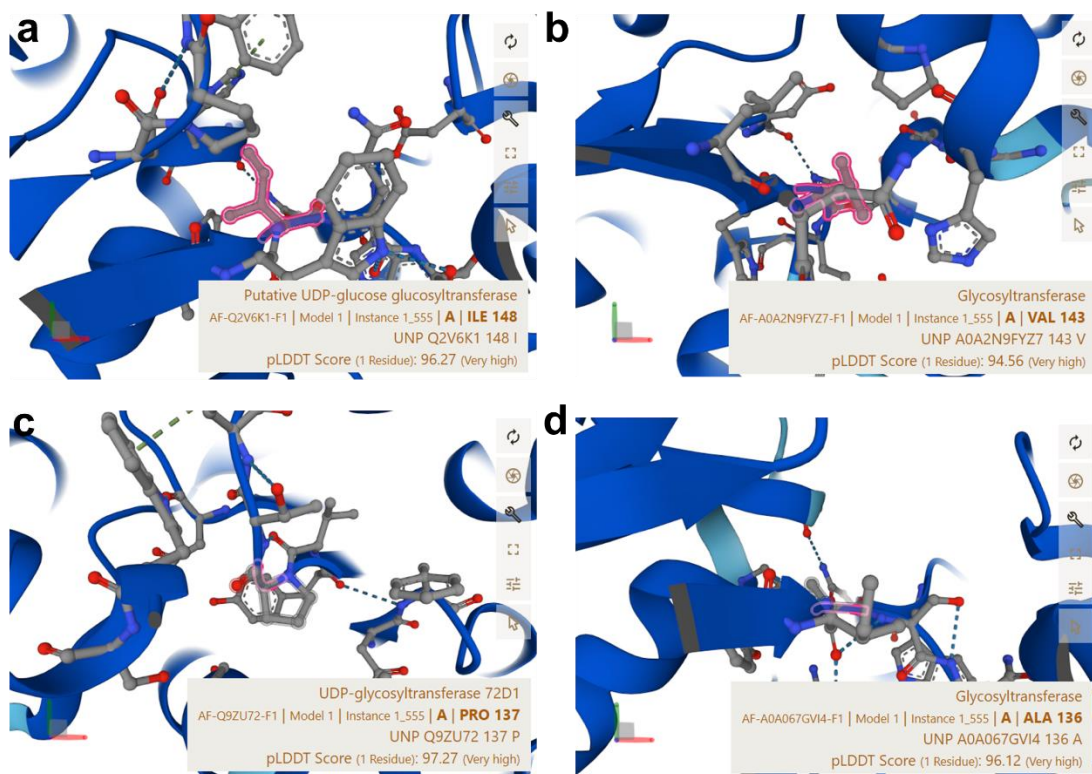

414

415 **Supplementary Figure 34.** Structural depiction of pLDDT scores for the residues near glucose  
416 C6-OH in the AlphaFold-predicted structures of UGT84A49 (**a**), UGT84A119 (**b**), UGT72D1  
417 (**c**) and UGT72D7 (**d**).

418

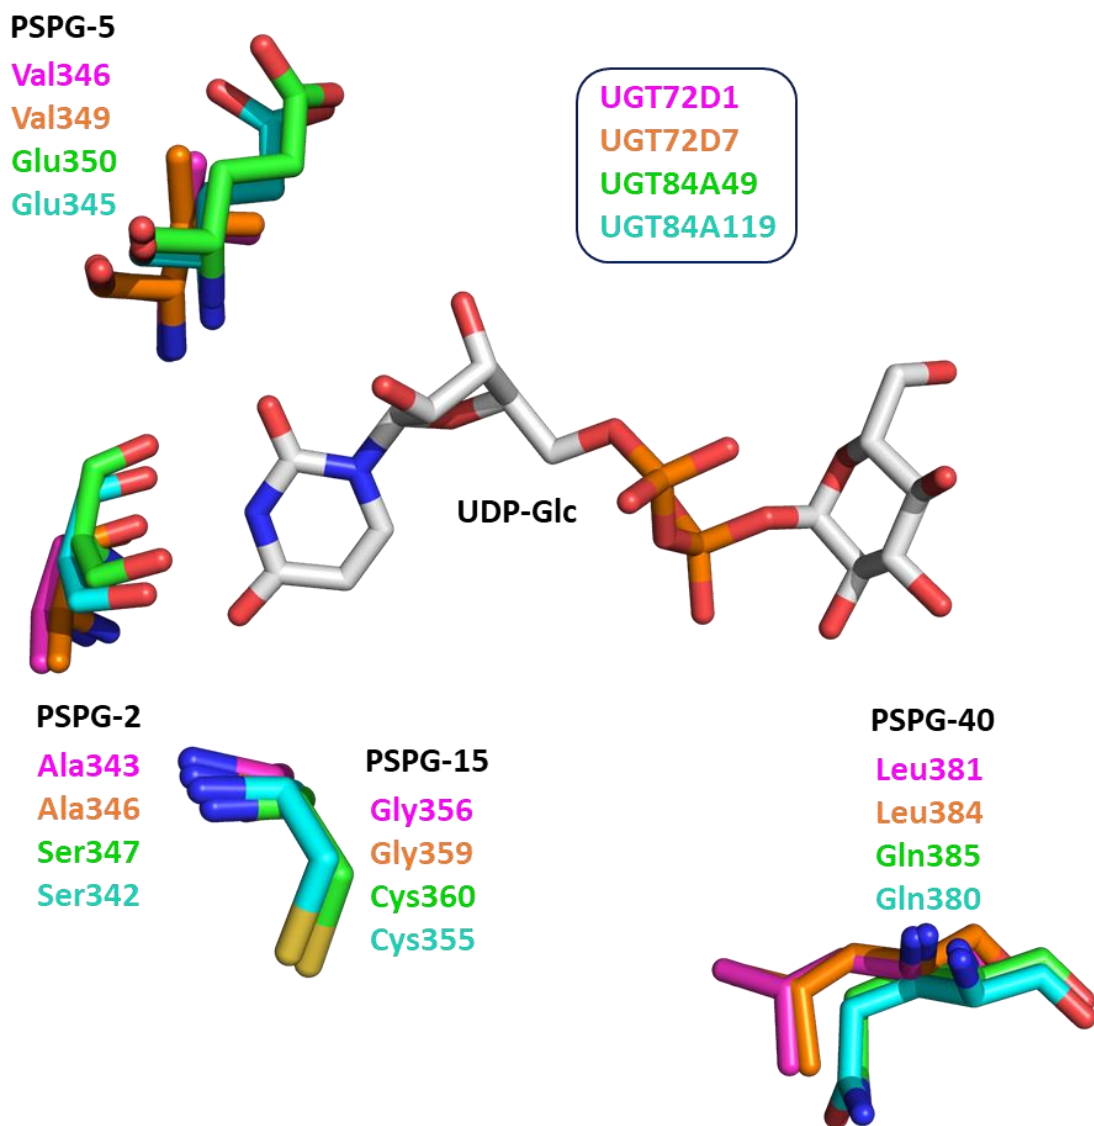

419

420 **Supplementary Figure 35.** Active site overlay of the AlphaFold-predicted UGT structures  
 421 showing the residues in PSPG box positions 2, 5, 15 and 40. UDP-glucose is from the donor  
 422 complex of GgCGT (PDB: 6L5P<sup>4</sup>).

423





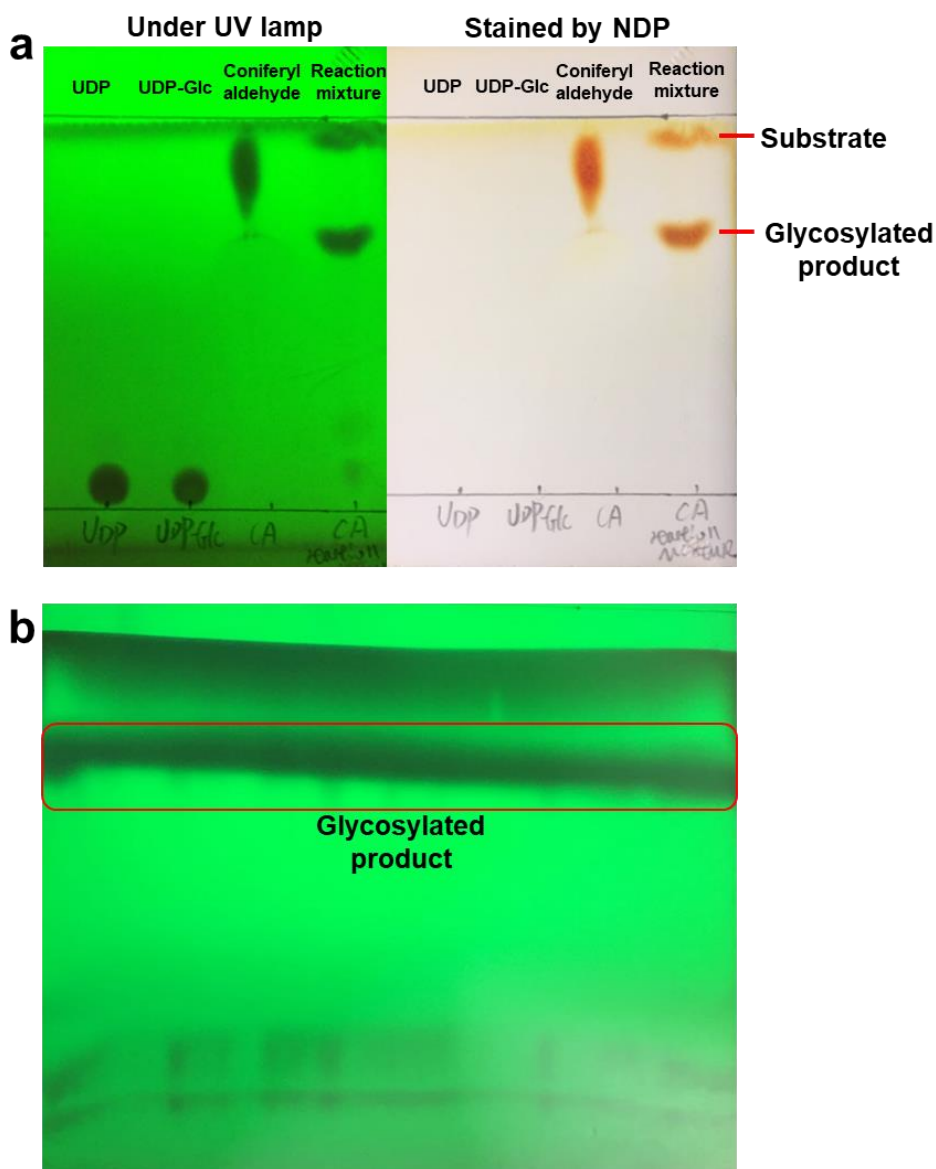

429

430 **Supplementary Figure 37.** Analysis and isolation of glycosylated product of coniferyl  
 431 aldehyde by TLC. **a.** TLC analysis of the UGT72D1/coniferyl aldehyde reaction mixture,  
 432 visualized under a UV lamp (left) or dyed by dinitrophenylhydrazine (DNP) stain (right). **b.**  
 433 Silica plate used for the isolation of coniferyl aldehyde 4-*O*-glucoside from preparative  
 434 UGT72D1 reactions, visualized under a UV lamp. DNP stain could react with aldehydes and  
 435 form the corresponding hydrazones, which are usually yellow to orange.

436

437 **Supplementary References**

- 438 1. Savino, S., Borg, A. J.E., Dennig, A. et al. Deciphering the enzymatic mechanism of  
439 sugar ring contraction in UDP-apiose biosynthesis. *Nat. Catal.* **2**, 1115-1123 (2019).
- 440 2. Nidetzky, B., Gutmann, A., & Zhong, C. Leloir glycosyltransferases as biocatalysts for  
441 chemical production. *ACS Catal.* **8**, 6283-6300 (2018).
- 442 3. Offen, W. et al. Structure of a flavonoid glucosyltransferase reveals the basis for plant  
443 natural product modification. *EMBO J.* **25**, 1396-1405 (2006).
- 444 4. Zhang, M. et al. Functional characterization and structural basis of an efficient di-C-  
445 glycosyltransferase from *Glycyrrhiza glabra*. *J. Am. Chem. Soc.* **142**, 3506-3512 (2020).
- 446
