# Supplementary material for: Discovery, characterization, and comparative analysis of new UGT72 and UGT84 family glycosyltransferases
Source: PubMed Central journal article supplement (PMC11213884; doi:10.1038/s42004-024-01231-1), 2024-06-28
Supplement: 42004_2024_1231_MOESM3_ESM.pdf [file 42004_2024_1231_MOESM3_ESM.pdf]

## **Description of Additional Supplementary Files**

File name- Supplementary Data 1

File description- Supplementary file containing the source data for Figures 3, 4 and 5 of the paper
